# Supplementary material for: Investigating synergistic cooperativity of metal-Brønsted acid site pair in MFI-type zeolites by synchrotron X-ray powder diffraction
Source: Royal Society of Chemistry journal article supplement (doi:10.1039/d4ta04737k), 2024-01-01
Supplement: d4ta04737k1.pdf [file d4ta04737k1.pdf]

## Supporting Information

### Investigating Synergistic Cooperativity of Metal-Brønsted Acid Site Pair in *MFI*-type Zeolites by Synchrotron X-ray Powder Diffraction

Ching Kit Tommy Wun<sup>1,A</sup>, Zi Wang<sup>1,A</sup>, Shogo Kawaguchi<sup>2</sup>, Shintaro Kobayashi<sup>2</sup>,  
Tai-Sing Wu<sup>3</sup>, Tianxiang Chen<sup>1</sup>, Cong Lin<sup>1</sup>, Chiu C. Tang<sup>1</sup>, Jun Yin<sup>4,\*</sup>, Tsz Woon  
Benedict Lo<sup>1,4,5\*</sup>

1: State Key Laboratory of Chemical Biology and Drug Discovery, Department of Applied Biology and Chemical Technology, The Hong Kong Polytechnic University, Hong Kong, China

2: Japan Synchrotron Radiation Research Institute (JASRI), SPring-8, 1-1-1 Kouto, Sayocho, Sayo-gun, Hyogo 679-5198, Japan

3: National Synchrotron Radiation Research Center, 101 Hsien-Ann Road, Hsinchu, 30076, Taiwan, R. O. C.

4: Department of Applied Physics, The Hong Kong Polytechnic University, Hong Kong, China

5: The Hong Kong Polytechnic University Shenzhen Research Institute, The Hong Kong Polytechnic University, Shenzhen, 518057, China

A: The authors share equal contributions.

## **Materials and methods**

### **Materials**

#### M/X-Z zeolites (M = Cu, Fe; X = Al, Ga, B)

Synthesis of M/X-Z samples was attempted by the “acidic co-hydrolysis route”. Metal nitrate (0.00048 mol) was added to the solution of tetraethyl orthosilicate (TEOS) (10 g) and DI water (32.5 g). the pH of the mixture was adjusted to 1.0 by drop-wise adding sulfuric acid. After the pH adjustment, the mixture was stirred at room temperature for 20 h to get a complete co-hydrolysis and condensation of TEOS with the metal salt. After that, the source of the Brønsted acid site (1.2 mmol), 0.75 g of aluminum (aluminum sulfate octadecahydrate as an example), and tetrapropylammonium hydroxide (TPAOH) (4.8 mmol) was added into the mixture with the dripping of NaOH solution to get a basic gel (pH = 9.8). The final gel composition was 1SiO<sub>2</sub>: 0.01 Metal: 40 H<sub>2</sub>O: 0.1 TPAOH. Finally, the slurry was transferred into the 100 mL Teflon-lined stainless-steel autoclave and statically crystallized at 180 °C for 72 h. After that, the zeolite was separated by centrifugation, followed by washing with DI water, and air drying at 70 °C for overnight. The obtained as-synthesized samples were calcinated at 550 °C for 5 h to remove the organic template. H-form of the zeolite was prepared by ammonia treatment. The zeolite was firstly converted into NH<sub>4</sub>-form by ion exchange with 1.0 M ammonia solution at room temperature for 24 h (1g solid to 100 mL solution). The zeolite samples were separated by centrifugation, followed by washing with DI water, and air drying at 70 °C for overnight. The NH<sub>4</sub>-form samples were converted to H-form by calcination at 500 °C under dry air for 4h.

## Method

### High-resolution synchrotron PXRD

Synchrotron PXRD measurements for structural determination were collected at beamline BL02B2 at SPring-8, Japan. The energy of the incident X-ray flux was set at 17.7 keV<sup>[1]</sup>. The wavelength ( $\lambda = 0.700261 \text{ \AA}$ ) and the  $2\theta$ -zero point ( $ZP = 0.00020^\circ$ ) were calibrated using a diffraction pattern obtained from a high-quality CeO<sub>2</sub> powder (NIST SRM674b). High-resolution synchrotron PXRD data were obtained from the zeolite samples (loaded in 0.5-mm borosilicate capillaries) using the Microstrip sYstem for Time rEsolved experimeNts (MYTHEN) detectors, with a modular system constructed by six MYTHEN detectors. The patterns were collected in the  $2\theta$  range 2–70° with 0.006° data binning. Each synchrotron PXRD pattern was collected for 5 min for each  $2\theta$ -step, i.e., 10 min in total for MYTHEN data summation. This procedure produced good quality patterns of a high signal-to-noise ratio. It should be particularly noted that the R-factors using the MYTHEN detectors are artificially high. Therefore, the quality of the Rietveld refinement should be best judged by the difference between the fitted and observed data.

Using the TOPAS software, the lattice parameters were obtained using Le Bail and Rietveld refinement analyses of the diffraction patterns were performed. The starting coordinates used were based on the H-ZSM-5 zeolite model by Heo *et al.* for the refinement<sup>[2]</sup>. The background curve was fitted by a Chebyshev polynomial with an average of 20 coefficients. The Thompson-Cox-Hastings (pseudo-Voigt) function was applied to describe the diffraction peaks<sup>[3]</sup>. The scale factor and lattice parameters were allowed to vary for all the histograms.

The final refined structural parameters for each data histogram were carried out using the Rietveld method with the fractional coordinates ( $x, y, z$ ) and isotropic displacement factors ( $B_{eq}$ ) for all atoms. In addition, the  $R_{wp}$  and  $gof$  values ( $gof = R_{wp}/R_{exp}$ ) helped assess the quality of fit, where  $R_{exp}$  represents the quality of the data. So, the  $R_{wp}$  value should be close to  $R_{exp}$  for a good fit.

### Fourier-Transform infrared spectroscopy (FTIR)

FTIR in an attenuated total reflection (ATR) mode was measured using Thermo Scientific Nicolet iS50 equipped with a single bounce diamond crystal and a deuterated triglycine sulfate (DTGS) detector.

### X-ray absorption fine structure (XAFS)

The XAFS data of a series of zeolite catalysts were collected at Beamline BL07A of the Taiwan Light Source (Taiwan). A Si (111) double crystal monochromator (DCM) was used to scan the photon energy.

#### Temperature-programmed desorption of ammonia (NH<sub>3</sub>-TPD)

Typically, 100 mg of sample was pre-treated in a helium stream (30 mL min<sup>-1</sup>) at 600 °C for 2 h. The adsorption of NH<sub>3</sub> was carried out at 50 °C for 1 h. The catalyst was flushed with helium at 100 °C for 2 h to remove physisorbed NH<sub>3</sub> from the catalyst surface. The TPD profile was recorded at a heating rate of 10 °C min<sup>-1</sup> from 100 °C to 600 °C.

#### Pyridine-assisted FT-IR (Py-FTIR)

Wafers with a weight of 25 mg and radius of 6.5 mm were degassed for 1 h under vacuum at 600 °C. Then pyridine was admitted, and after equilibration, the samples were outgassed for 0.5 h at increasing temperatures (150, 200, 250, 350, and 450 °C). The spectra were recorded on a Nicolet iS50 FT-IR spectrometer.

#### Inductively Coupled Plasma Optical Emission Spectroscopy (ICP-OES).

The chemical composition of the samples was determined using a 5900 ICP-OES from Agilent Technologies. For the ICP-OES spectroscopy analysis, 0.5 mg of zeolite powder was first dissolved in a mixture of HF solution (2 mL, 39%, Merck) and aqua regia, and stirred for at least 12 hours. After dissolution, the solution was diluted and filtered using a 0.45- $\mu$ m microfilter. Boric acid was added to the solution to minimize fluoride interferences during the measurement.

#### Styrene oxidation

The catalytic performance of M/X-Z for styrene oxidation was evaluated by the following procedure: 0.5 mmol of 4-chlorostyrene, 0.05 g M/X-Z, 1.5 mmol of 30% H<sub>2</sub>O<sub>2</sub> and 5 mL CH<sub>3</sub>CN were added into a 10 mL flask and then stirred at different temperature (50/70/90/110 °C) for 24 h. The reaction solution was analyzed by gas chromatography (Agilent 6890 N, flame ion detector, a 0.45  $\mu$ m  $\times$  5mm  $\times$  30m capillary column). The conversion of styrene and the selectivity of products were calculated by an internal standard method with dimethoxybenzene as the internal standard sample. Meanwhile, the main products were testified by GC-MS (Agilent 7890/5975C GC/MSD).

#### GVL decarboxylation

The catalytic performance of M/X-Z for alkene oxidation was evaluated by the following procedure: 0.10 g of catalyst and 1.00 g of  $\gamma$ -valerolactone were added into the stainless-steel batch-stirred reactor (100 mL). Subsequently, the reactor was purged with N<sub>2</sub> three times to replace the air from the reactor. Then the reactor was heated to 250 °C to react for 12 h under stirred with 700 rpm. Finally, the reactor was cooled

down to room temperature with cold water after the reaction immediately. For the liquid and gas products, it was collected in a gas storage bag and qualitatively analyzed by the GC-MS, while the liquid products were dissolved in acetone and quantified and analyzed by the GC-MS.

### Density functional theory calculation (DFT)

The DFT calculations were performed using the projector-augmented wave method as implemented in the Vienna Ab initio Simulation Package (VASP). The generalized gradient approximation (GGA) with the Perdew-Burke-Ernzerhof (PBE) exchange-correlation functional was used. A uniform  $2 \times 2 \times 2$   $k$ -mesh grid in the Brillouin zone was used to optimize the crystal structures of Fe/X-Z and Cu/X-Z without and with GVL (or 4-chlorostyrene) adsorption. The kinetic energy cutoff for the wave functions was set at 450 eV. All the atomic positions of the Fe/X-Z and Cu/X-Z without and with GVL (or 4-chlorostyrene) adsorption were relaxed until the forces on each atom were less than 0.015 eV/Å. The binding energy for Fe/X-Z and Cu/X-Z with GVL (or 4-chlorostyrene) adsorption was calculated as  $E(\text{binding}) = E(\text{total}) - E(\text{Fe/X-Z and Cu/X-Z}) - E(\text{molecule})$ ; where  $E(\text{total})$  and  $E(\text{Fe/X-Z and Cu/X-Z})$  are the total energies of Fe/X-Z and Cu/X-Z with and without GVL (or 4-chlorostyrene) adsorption;  $E(\text{molecule})$  is the energy of a GVL (or 4-chlorostyrene) molecule.

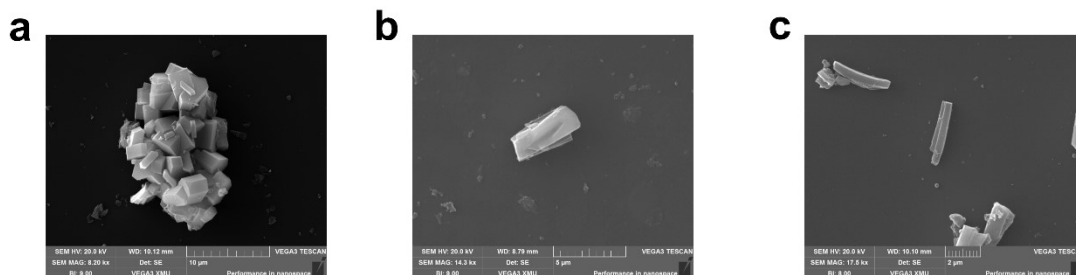

**Figure S1.** Morphology analysis by SEM. SEM images of (a) Fe/Al-Z, (b) Fe/Ga-Z, and (c) Fe/B-Z.

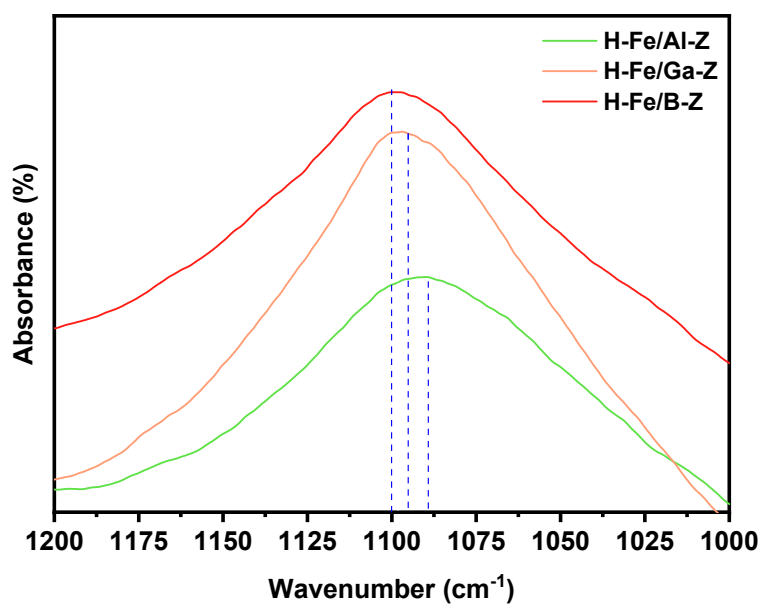

**Figure S2.** FTIR spectra of Fe/Al-Z, Fe/Ga-Z, and Fe/B-Z.

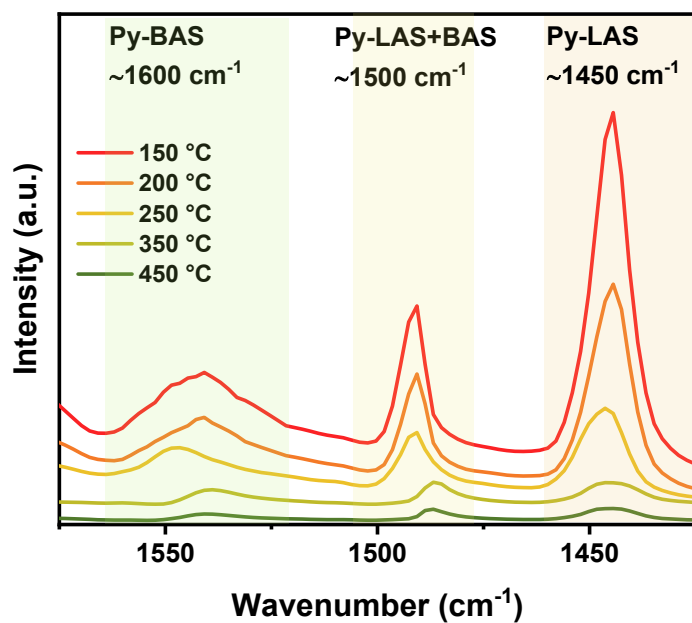

Figure S3. Py-FTIR spectra of Fe/Al-Z.

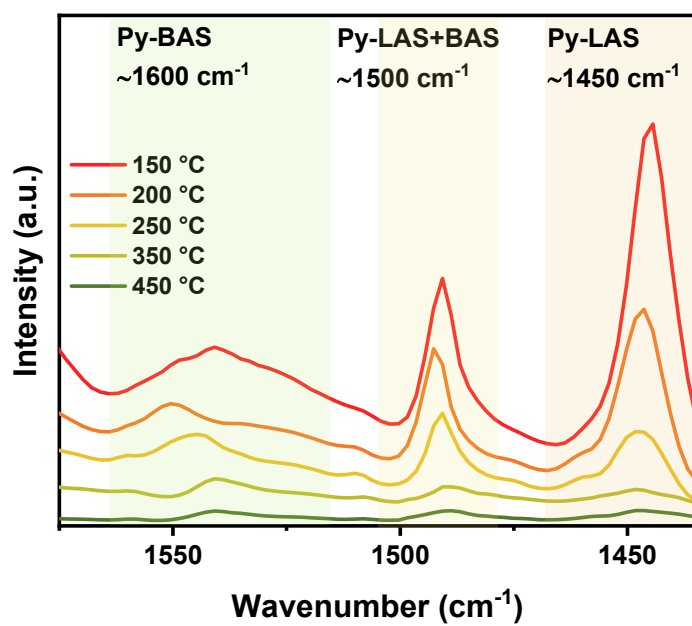

Figure S4. Py-FTIR spectra of Fe/Ga-Z.



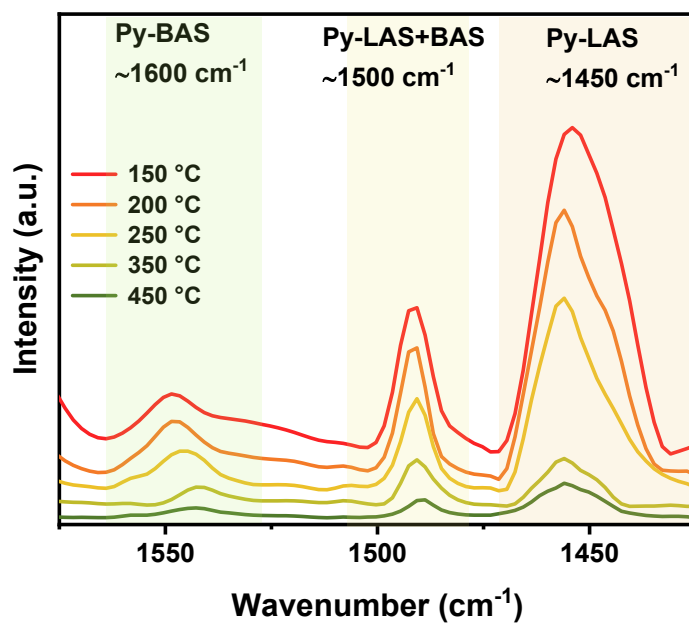

Figure S5. Py-FTIR spectra of Fe/B-Z.

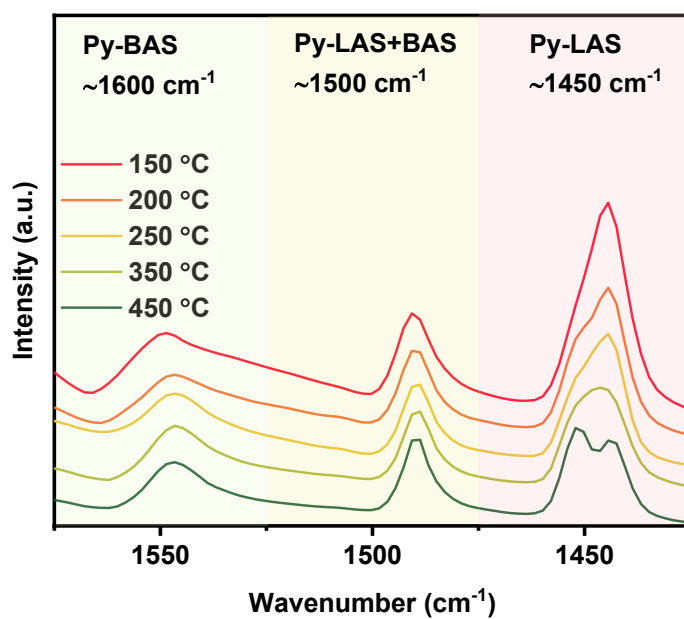

Figure S6. Py-FTIR spectra of Cu/Al-Z.

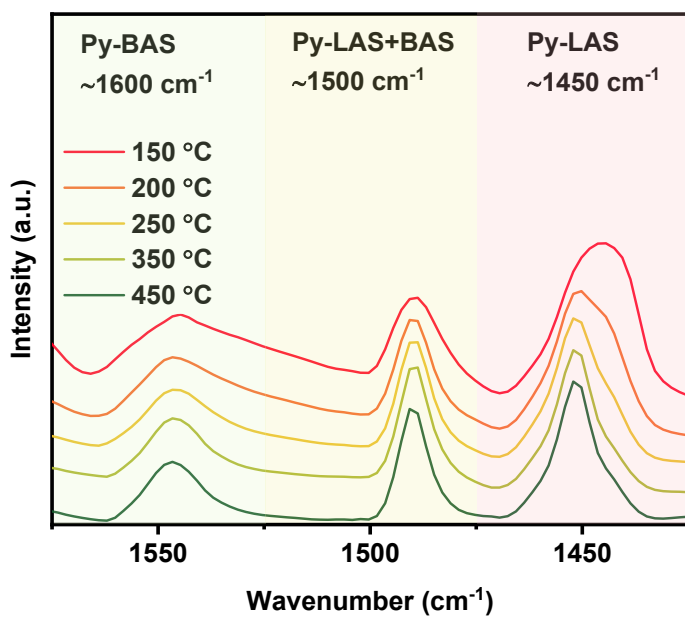

Figure S7. Py-FTIR spectra of Cu/Ga-Z.

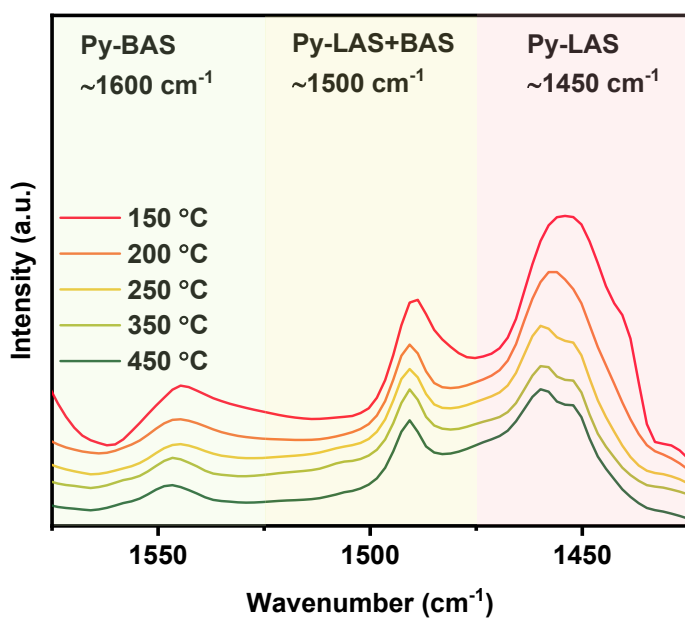

Figure S8. Py-FTIR spectra of Cu/B-Z.

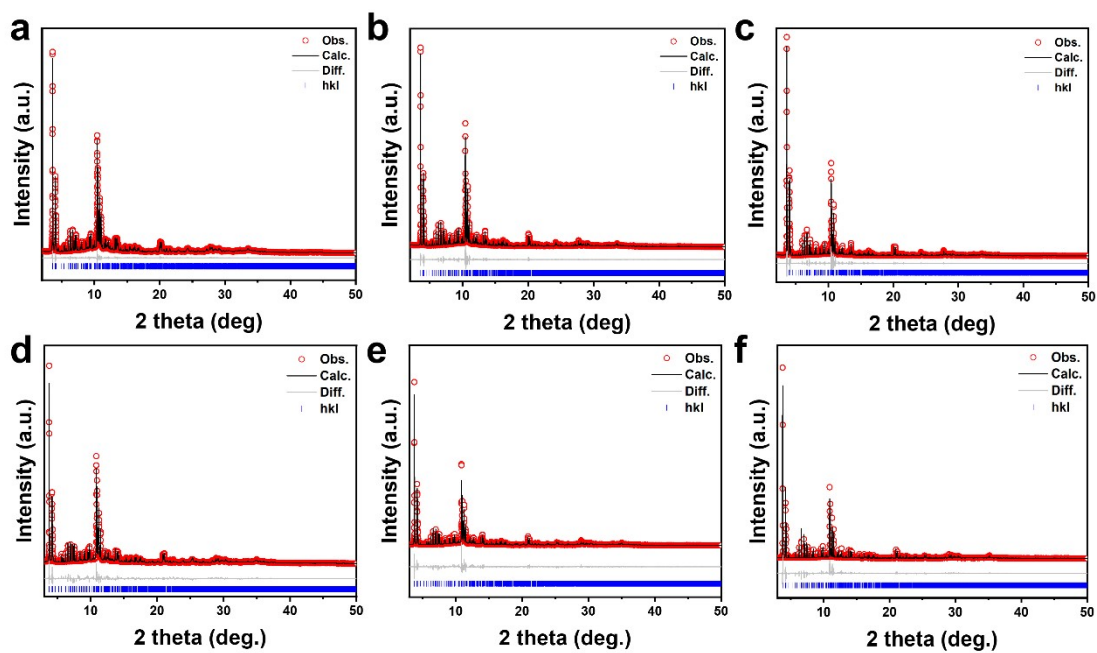

**Figure S9.** The Rietveld refinement profiles of high-resolution synchrotron PXRD of (a) Fe/Al-Z, (b) Fe/Ga-Z, (c) Fe/B-Z, (d) Cu/Al-Z, (e) Cu/Ga-Z, and (f) Cu/B-Z. The structural and atomic parameters are summarized in **Tables S13–S18**.

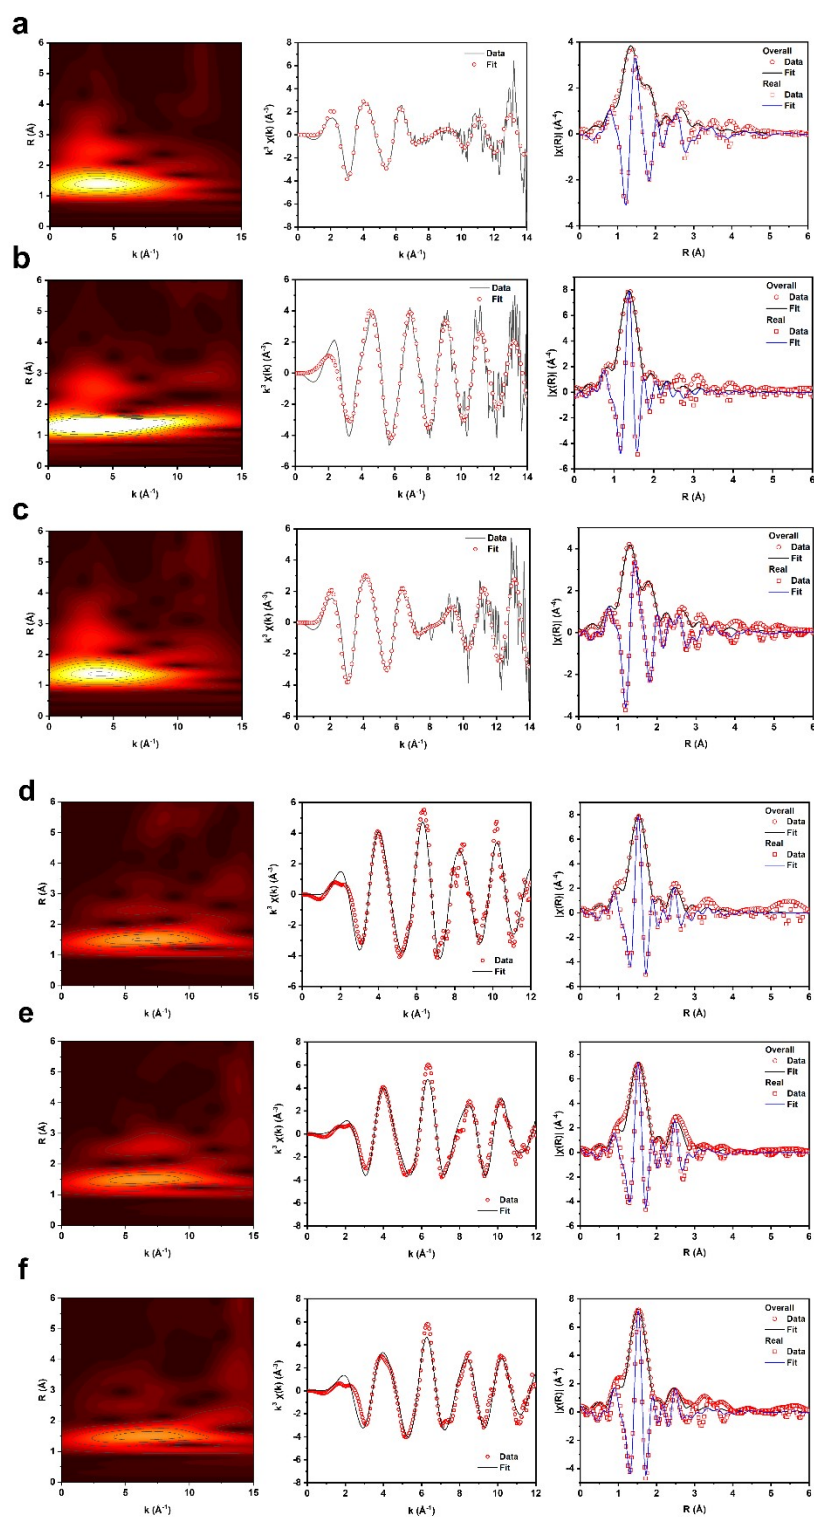

**Figure S10.** Wavelet transform for  $k^3$  weighted EXAFS signal of (a) Fe/Al-Z, (b) Fe/Ga-Z, (c) Fe/B-Z, (d) Cu/Al-Z, (e) Cu/Ga-Z, and (f) Cu/B-Z, and the corresponding Fe and Cu K-edge EXAFS (red) and fitting profile (black) in  $k^3$  weighted  $k$ -space and  $R$ -space.

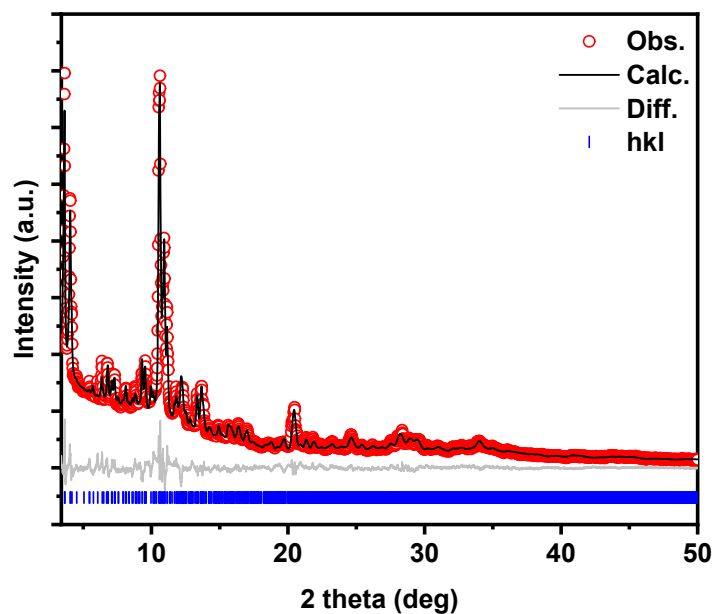

**Figure S11.** PXRD data and Rietveld refinement of 4-chlorostyrene pre-adsorbed on Fe/Al-Z.

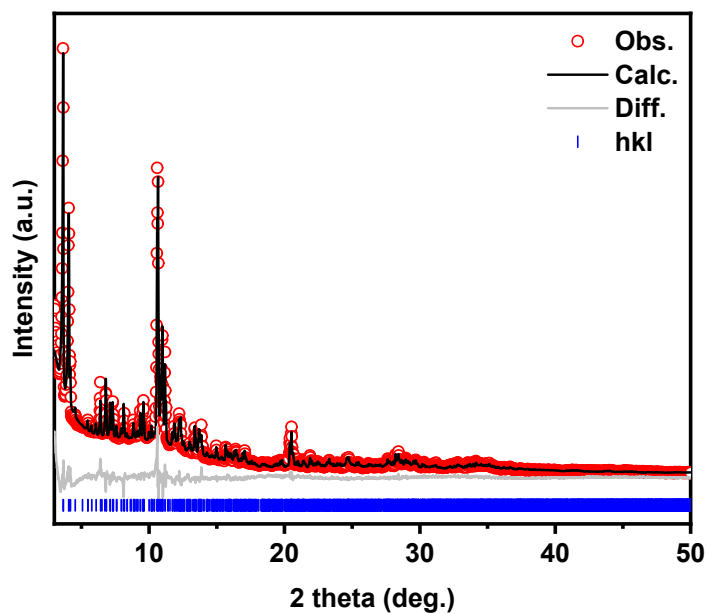

**Figure S12.** PXRD data and Rietveld refinement of 4-chlorostyrene pre-adsorbed on Fe/B-Z.

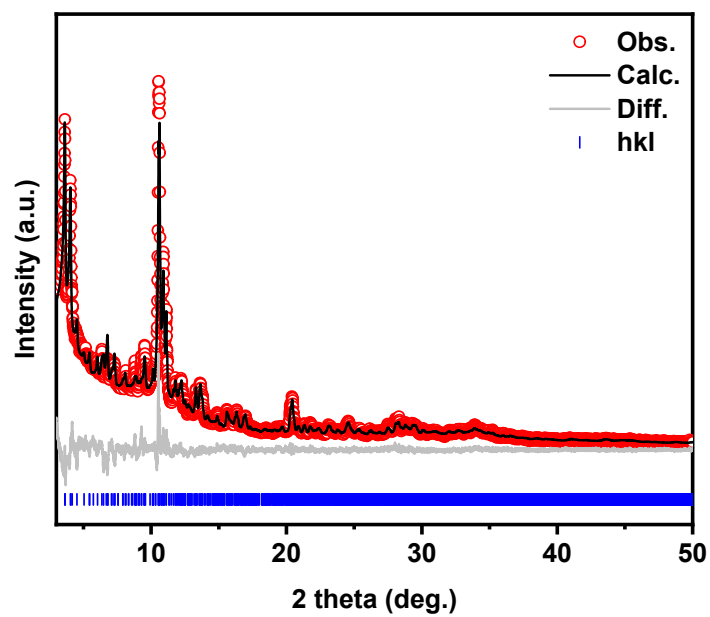

Figure S13. PXRD data and Rietveld refinement of GVL pre-adsorbed on Fe/Al-Z.

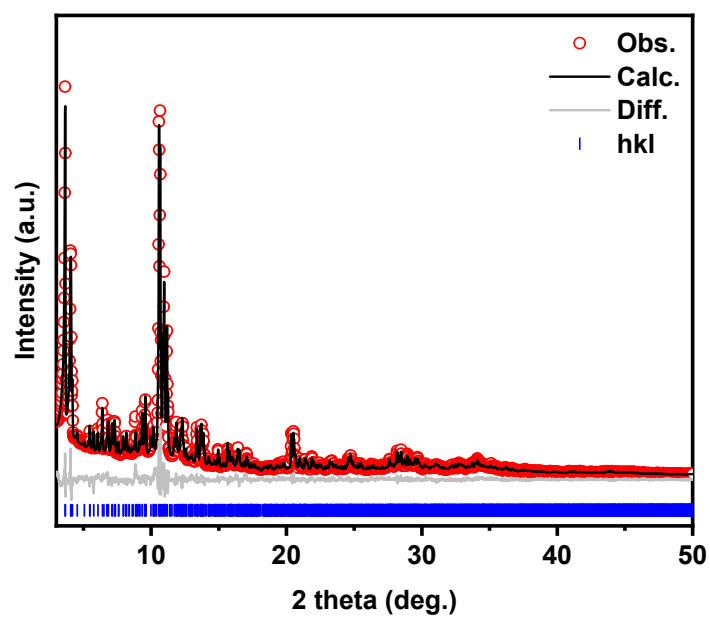

Figure S14. PXRD data and Rietveld refinement of GVL pre-adsorbed on Fe/B-Z.

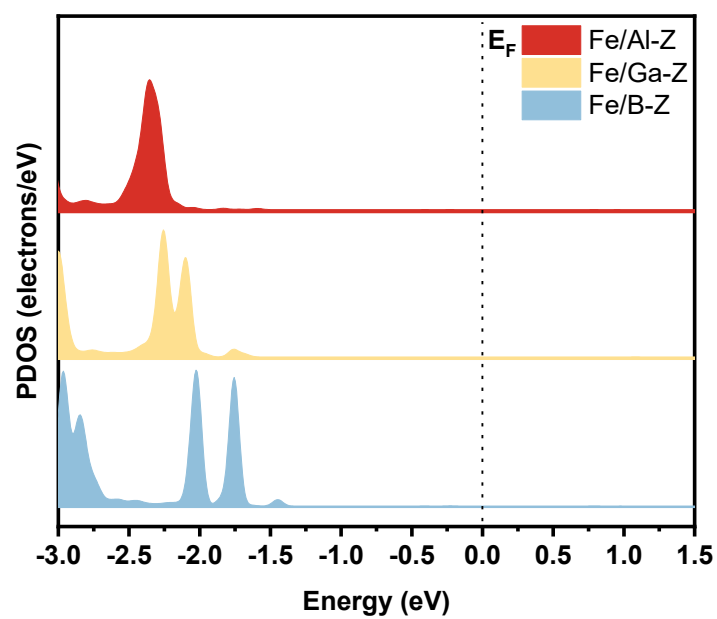

**Figure S15.** Projected density of states of substrate molecule orbitals for Fe/X-Z with pre-adsorbed GVL.

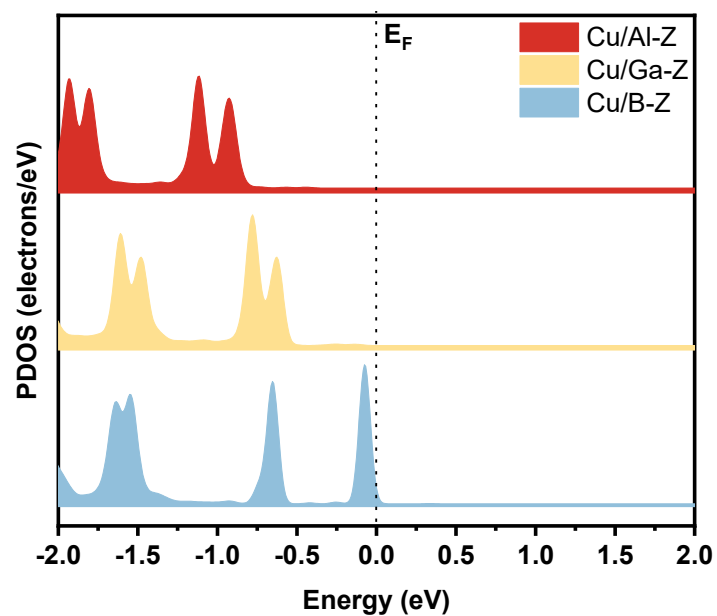

**Figure S16.** Projected density of states of substrate molecule orbitals for Cu/X-Z with pre-adsorbed GVL.

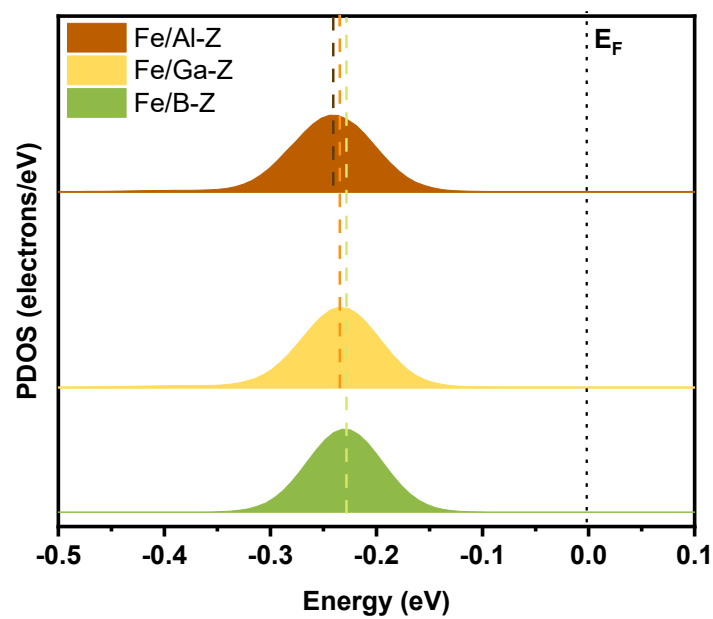

**Figure S17.** Projected density of states of substrate molecule orbitals for Fe/X-Z with pre-adsorbed 4-chlorostyrene.

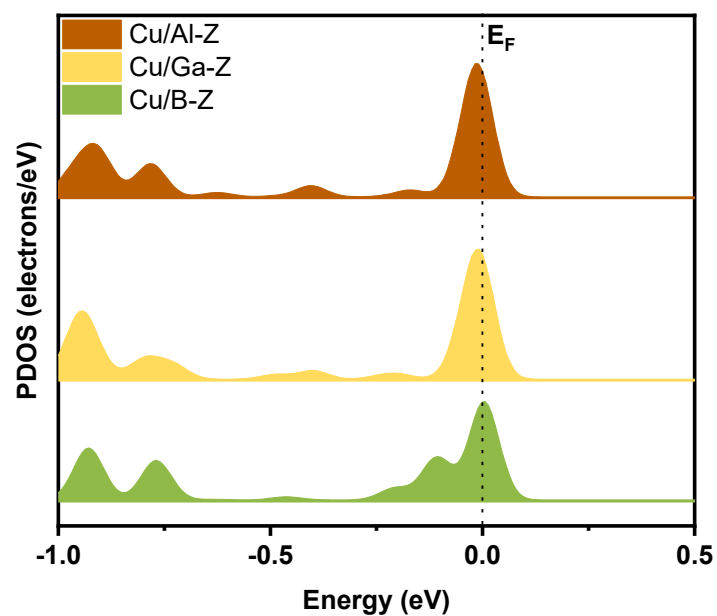

**Figure S18.** Projected density of states of substrate molecule orbitals for Cu/X-Z with pre-adsorbed 4-chlorostyrene.



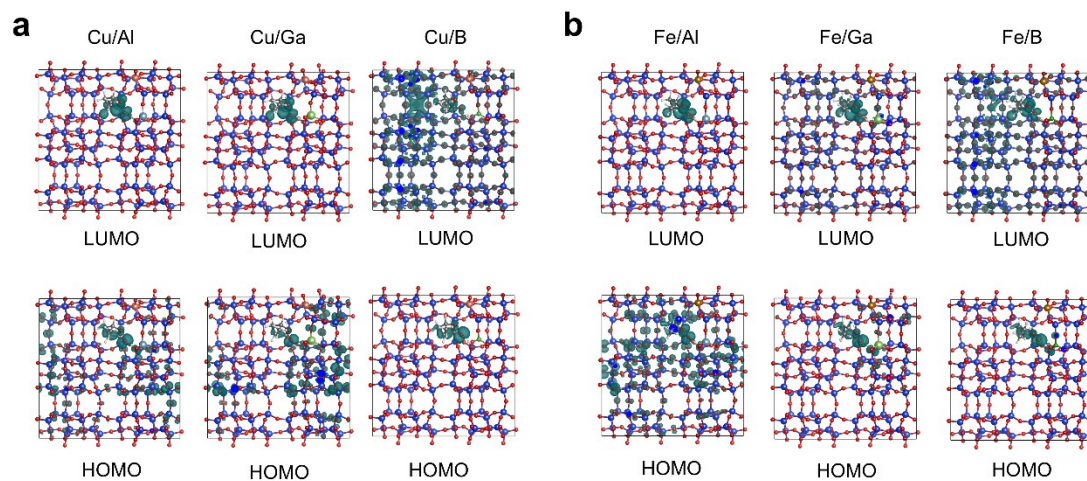

**Figure S19.** Electronic charge densities of LUMO and HOMO for (a) Cu/X-Z and (b) Fe/X-Z with pre-adsorbed GVL.

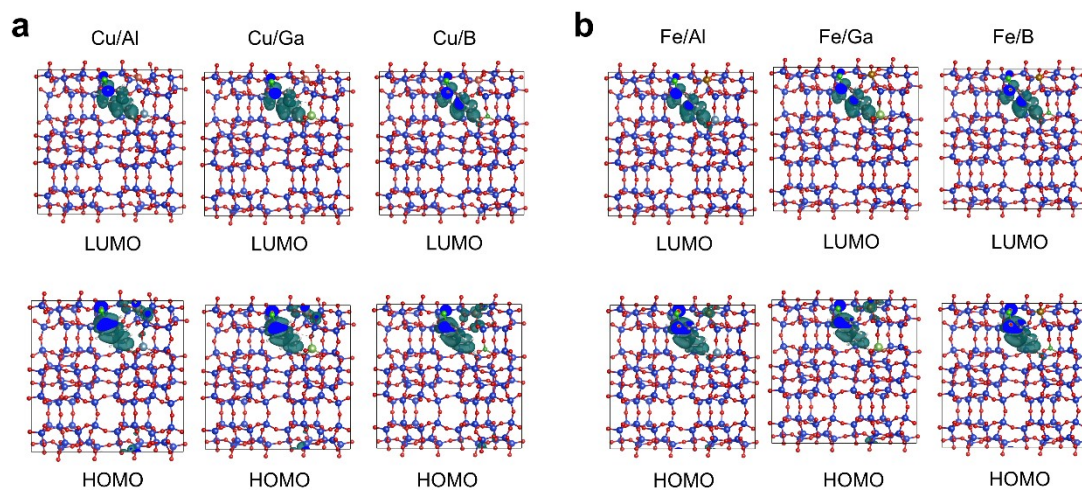

**Figure S20.** Electronic charge densities of LUMO and HOMO for (a) Cu/X-Z and (b) Fe/X-Z with pre-adsorbed 4-chlorostyrene.

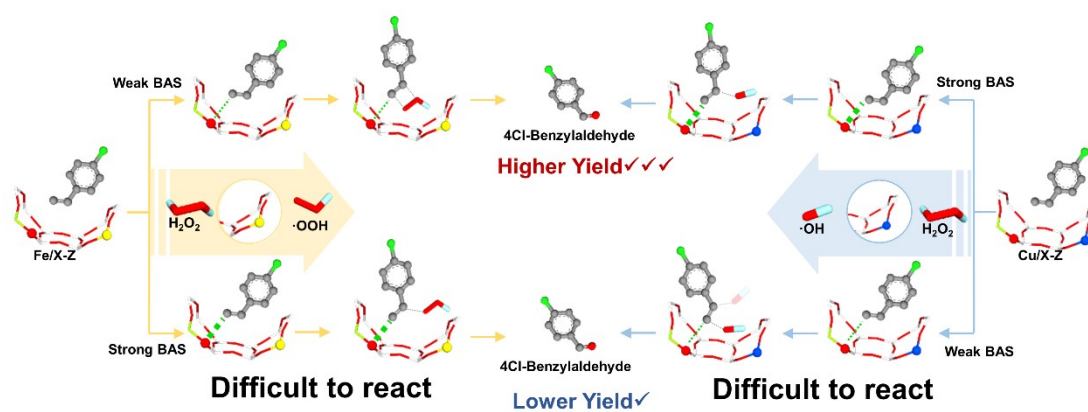

**Scheme S1.** Proposed reaction mechanism of the oxidation of 4-chlorostyrene over Fe/X-Z and Cu/X-Z with varying BAS strengths.

**Table S1.** Crystallographic data of the synchrotron PXRD measurement of the zeolite samples labelled.

|                                        | Fe/Al-Z           | Fe/Ga-Z           | Fe/B-Z             | Cu/Al-Z           | Cu/Ga-Z           | Cu/B-Z            |
|----------------------------------------|-------------------|-------------------|--------------------|-------------------|-------------------|-------------------|
| X-ray energy<br>(keV)                  | 17.7              | 17.7              | 17.7               | 17                | 17                | 17                |
| Beamline                               | Spring-8 BL02B2   | Spring-8 BL02B2   | Spring-8 BL02B2    | Spring-8 BL02B2   | Spring-8 BL02B2   | Spring-8 BL02B2   |
| Wavelength<br>(Å)                      | 0.700261          | 0.700261          | 0.700261           | 0.729589          | 0.729589          | 0.729589          |
| (synchrotron)                          |                   |                   |                    |                   |                   |                   |
| 2 $\theta$ – zero point<br>(°)         | 0.00020           | 0.00020           | 0.00020            | -0.00019          | -0.00019          | -0.00019          |
| Space group                            | <i>Pnma</i>       | <i>Pnma</i>       | <i>Pnma</i>        | <i>Pnma</i>       | <i>Pnma</i>       | <i>Pnma</i>       |
| Crystal system                         | Orthorhombic      | Orthorhombic      | Orthorhombic       | Orthorhombic      | Orthorhombic      | Orthorhombic      |
| <i>a</i> (Å)                           | 20.13162(15)      | 20.11702(17)      | 20.08193(27)       | 20.14844(16)      | 20.12378(21)      | 20.04048(11)      |
| <i>b</i> (Å)                           | 19.93828(16)      | 19.91554(19)      | 19.86314(31)       | 19.94904(16)      | 19.91965(24)      | 19.85013(10)      |
| <i>c</i> (Å)                           | 13.41994(14)      | 13.40324(15)      | 13.37000(22)       | 13.42828(14)      | 13.40730(18)      | 13.36017(7)       |
| <i>V</i> (Å <sup>3</sup> )             | 5386.63(8)        | 5369.89(9)        | 5333.16(14)        | 5397.39(8)        | 5374.43(11)       | 5314.76(5)        |
| 2 $\theta$ range for<br>refinement (°) | 2-50              | 2-50              | 2-50               | 3-50              | 3-50              | 3-50              |
| Detector                               | MYTHEN            | MYTHEN            | MYTHEN             | MYTHEN            | MYTHEN            | MYTHEN            |
| Number of<br>parameters                | 27                | 27                | 29                 | 27                | 27                | 27                |
| Number of<br><i>hkl</i> s              | 5241              | 5246              | 5246               | 4648              | 4647              | 4580              |
| Refinement<br>methods                  | LeBail            | LeBail            | LeBail             | LeBail            | LeBail            | LeBail            |
| $R_{wp}/R_{exp}/R_p$ (%)               | 2.905/0.694/2.059 | 5.906/0.791/3.657 | 10.759/0.737/6.108 | 3.404/0.831/2.342 | 5.631/0.760/3.520 | 6.780/0.761/4.275 |
| <i>Gof</i>                             | 4.189             | 7.465             | 14.594             | 4.095             | 7.414             | 8.913             |

$R_{wp}$ : weighted profile;  $R_{exp}$ : expected;  $R_p$ : profile; *gof*: goodness-of-fit.

**Table S2.** element content of the zeolite samples.

| Sample  | Si<br>(Atom%) | M (Fe, Cu)<br>(Atomic %) | X (Al, Ga, B)<br>(Atomic %) | Si:M     | Si:X     |
|---------|---------------|--------------------------|-----------------------------|----------|----------|
| Fe/Al-Z | 88.20         | 1.92                     | 9.88                        | 1: 0.021 | 1: 0.112 |
| Fe/Ga-Z | 93.41         | 2.09                     | 4.51                        | 1: 0.022 | 1: 0.048 |
| Fe/B-Z  | 96.82         | 1.45                     | 1.73                        | 1: 0.015 | 1: 0.018 |
| Cu/Al-Z | 91.79         | 1.23                     | 6.98                        | 1: 0.013 | 1: 0.076 |
| Cu/Ga-Z | 93.19         | 0.94                     | 5.87                        | 1: 0.010 | 1: 0.063 |
| Cu/B-Z  | 95.48         | 0.84                     | 3.68                        | 1: 0.009 | 1: 0.038 |

**Table S3** Summary of the acidity of the zeolite samples. Values were determined by combined NH<sub>3</sub>-TPD and Py-FTIR results.

| Catalyst | Weak acid <sup>a</sup><br>(mmol g <sup>-1</sup> ) | Strong acid <sup>a</sup><br>(mmol g <sup>-1</sup> ) | strong/weak<br>acid ratio <sup>a</sup> | Total acid <sup>a</sup><br>(mmol g <sup>-1</sup> ) | B/L<br>acid<br>ratio <sup>b</sup> |
|----------|---------------------------------------------------|-----------------------------------------------------|----------------------------------------|----------------------------------------------------|-----------------------------------|
| Fe/Al-Z  | 1.315                                             | 0.335                                               | 0.255                                  | 1.650                                              | 0.50                              |
| Fe/Ga-Z  | 0.761                                             | 0.163                                               | 0.211                                  | 0.924                                              | 0.481                             |
| Fe/B-Z   | 0.449                                             | 0.003                                               | 0.006                                  | 0.452                                              | 0.213                             |
| Cu/Al-Z  | 1.054                                             | 0.738                                               | 0.700                                  | 1.792                                              | 0.796                             |
| Cu/Ga-Z  | 0.463                                             | 0.203                                               | 0.437                                  | 0.666                                              | 0.664                             |
| Cu/B-Z   | 0.278                                             | 0.105                                               | 0.377                                  | 0.383                                              | 0.617                             |

a. From NH<sub>3</sub>-TPD

b. From Py-FTIR

**Table S4** Crystallographic data of the synchrotron PXRD measurements of the pyridine pre-adsorbed zeolite samples.

|                                     | Py-Fe/Al-Z         | Py-Fe/Ga-Z         | Py-Fe/B-Z          | Py-Cu/Al-Z         | Py-Cu/Ga-Z         | Py-Cu/B-Z          |
|-------------------------------------|--------------------|--------------------|--------------------|--------------------|--------------------|--------------------|
| X-ray energy (keV)                  | 17.7               | 17.7               | 17.7               | 17                 | 17                 | 17                 |
| Beamline                            | Spring-8<br>BL02B2 | Spring-8<br>BL02B2 | Spring-8<br>BL02B2 | Spring-8<br>BL02B2 | Spring-8<br>BL02B2 | Spring-8<br>BL02B2 |
| Wavelength (Å)                      | 0.700261           | 0.700261           | 0.700261           | 0.729589           | 0.729589           | 0.729589           |
| 2 $\theta$ – zero point (°)         | 0.00020            | 0.00020            | 0.00020            | -0.00019           | -0.00019           | -0.00019           |
| Space group                         | <i>Pnma</i>        | <i>Pnma</i>        | <i>Pnma</i>        | <i>Pnma</i>        | <i>Pnma</i>        | <i>Pnma</i>        |
| Crystal system                      | Orthorhombic       | Orthorhombic       | Orthorhombic       | Orthorhombic       | Orthorhombic       | Orthorhombic       |
| <i>a</i> (Å)                        | 20.07500(32)       | 20.11925(10)       | 20.08267(24)       | 20.11861(20)       | 20.10727(13)       | 20.03008(10)       |
| <i>b</i> (Å)                        | 19.87873(27)       | 19.89772(10)       | 19.85981(29)       | 19.95147(20)       | 19.92729(14)       | 19.83891(10)       |
| <i>c</i> (Å)                        | 13.40706(22)       | 13.42167(9)        | 13.38353(23)       | 13.44488(19)       | 13.41986(12)       | 13.35547(8)        |
| <i>V</i> (Å <sup>3</sup> )          | 5350.30(14)        | 5373.06(5)         | 5337.86(14)        | 5396.72(11)        | 5377.12(7)         | 5307.13(5)         |
| 2 $\theta$ range for refinement (°) | 2-50               | 2-50               | 2-50               | 3-50               | 3-50               | 3-50               |
| Detector                            | MYTHEN             | MYTHEN             | MYTHEN             | MYTHEN             | MYTHEN             | MYTHEN             |
| Number of parameters                | 28                 | 24                 | 24                 | 27                 | 27                 | 27                 |
| Number of <i>hkl</i> s              | 5256               | 5249               | 5212               | 4644               | 4658               | 4576               |
| Refinement methods                  | LeBail             | LeBail             | LeBail             | LeBail             | LeBail             | LeBail             |
| $R_{wp}/R_{exp}/R_p$ (%)            | 3.689/0.726/2.5    | 3.558/0.746/2.5    | 9.897/0.759/5.8    | 3.263/0.865/2.2    | 3.936/0.736/2.7    | 7.055/0.733/4.2    |
| <i>Gof</i>                          | 5.084              | 4.770              | 13.042             | 3.770              | 5.346              | 9.622              |

$R_{wp}$ : weighted profile;  $R_{exp}$ : expected;  $R_p$ : profile; *gof*: goodness-of-fit.

**Table S5** Atomic parameters of Py-Fe/Al-Z derived from synchrotron PXRD.

| Species              | Atom    | x       | y        | z        | SOF    | B <sub>eq</sub> | Wyckoff |
|----------------------|---------|---------|----------|----------|--------|-----------------|---------|
| Zeolite<br>framework | O1      | 0.36489 | 0.05895  | 0.76052  | 1      | 1.3968          | 8d      |
|                      | O2      | 0.30581 | 0.06876  | 0.92451  | 1      | 1.3968          | 8d      |
|                      | O3      | 0.20497 | 0.05808  | 0.01484  | 1      | 1.3968          | 8d      |
|                      | O4      | 0.08619 | 0.06535  | 0.92424  | 1      | 1.3968          | 8d      |
|                      | O5      | 0.13149 | 0.04593  | 0.75060  | 1      | 1.3968          | 8d      |
|                      | O6      | 0.25258 | 0.05714  | 0.72809  | 1      | 1.3968          | 8d      |
|                      | O7      | 0.37456 | 0.85138  | 0.74921  | 1      | 1.3968          | 8d      |
|                      | O8      | 0.28716 | 0.83291  | 0.91950  | 1      | 1.3968          | 8d      |
|                      | O9      | 0.19531 | 0.84373  | 0.05442  | 1      | 1.3968          | 8d      |
|                      | O10     | 0.06315 | 0.84501  | 0.93008  | 1      | 1.3968          | 8d      |
|                      | O11     | 0.10665 | 0.84750  | 0.71981  | 1      | 1.3968          | 8d      |
|                      | O12     | 0.23507 | 0.83455  | 0.75581  | 1      | 1.3968          | 8d      |
|                      | O13     | 0.30894 | 0.94376  | 0.81333  | 1      | 1.3968          | 8d      |
|                      | O14     | 0.06832 | 0.95430  | 0.81205  | 1      | 1.3968          | 8d      |
|                      | O15     | 0.41385 | 0.13021  | 0.56598  | 1      | 1.3968          | 8d      |
|                      | O16     | 0.42853 | 0.98767  | 0.58886  | 1      | 1.3968          | 8d      |
|                      | O17     | 0.41367 | 0.87903  | 0.58130  | 1      | 1.3968          | 8d      |
|                      | O18     | 0.17407 | 0.13535  | 0.60737  | 1      | 1.3968          | 8d      |
|                      | O19     | 0.20533 | -0.01364 | 0.62343  | 1      | 1.3968          | 8d      |
|                      | O20     | 0.18998 | 0.85092  | 0.60966  | 1      | 1.3968          | 8d      |
|                      | O21     | 0.99350 | 0.05423  | 0.79371  | 1      | 1.3968          | 8d      |
|                      | O22     | 0.99546 | 0.85280  | 0.79006  | 1      | 1.3968          | 8d      |
|                      | O23     | 0.40563 | 0.75000  | 0.65828  | 1      | 1.3968          | 4c      |
|                      | O24     | 0.19533 | 0.75000  | 0.63190  | 1      | 1.3968          | 4c      |
| O25                  | 0.29224 | 0.75000 | 0.06621  | 1        | 1.3968 | 4c              |         |
| O26                  | 0.11226 | 0.75000 | 0.04182  | 1        | 1.3968 | 4c              |         |
| Pyridine1            | Si1     | 0.41588 | 0.06002  | 0.65566  | 1      | 0.6984          | 8d      |
|                      | Si2     | 0.30885 | 0.02717  | 0.81515  | 1      | 0.6984          | 8d      |
|                      | Si3     | 0.28282 | 0.06965  | 0.03070  | 1      | 0.6984          | 8d      |
|                      | Si4     | 0.10963 | 0.05713  | 0.02639  | 1      | 0.6984          | 8d      |
|                      | Si5     | 0.06686 | 0.03197  | 0.80184  | 1      | 0.6984          | 8d      |
|                      | Si6     | 0.18062 | 0.06305  | 0.66747  | 1.4655 | 0.6984          | 8d      |
|                      | Si7     | 0.42248 | 0.82219  | 0.67922  | 1      | 0.6984          | 8d      |
|                      | Si8     | 0.31064 | 0.86594  | 0.80821  | 1      | 0.6984          | 8d      |
|                      | Si9     | 0.26734 | 0.82841  | 0.03037  | 1      | 0.6984          | 8d      |
|                      | Si10    | 0.11923 | 0.82804  | 0.03326  | 1      | 0.6984          | 8d      |
|                      | Si11    | 0.07491 | 0.86887  | 0.82600  | 1      | 0.6984          | 8d      |
|                      | Si12    | 0.18000 | 0.83054  | 0.69340  | 1      | 0.6984          | 8d      |
| Pyridine2            | C1      | 0.29611 | 0.25616  | -0.12414 | 0.5574 | 8               | 8d      |
|                      | C2      | 0.24489 | 0.26873  | -0.05686 | 0.5574 | 8               | 8d      |
|                      | C3      | 0.17946 | 0.25882  | -0.08599 | 0.5574 | 8               | 8d      |
|                      | C4      | 0.16463 | 0.23654  | -0.18144 | 0.5574 | 8               | 8d      |
|                      | C5      | 0.21586 | 0.22398  | -0.24871 | 0.5574 | 8               | 8d      |
|                      | C6      | 0.28128 | 0.23389  | -0.21955 | 0.5574 | 8               | 8d      |
| Pyridine2            | C11     | 1.49595 | 1.06343  | 0.99928  | 0.8615 | 8               | 8d      |
|                      | C12     | 1.52140 | 1.11003  | 1.06661  | 0.8615 | 8               | 8d      |
|                      | C13     | 1.52747 | 1.17675  | 1.03839  | 0.8615 | 8               | 8d      |
|                      | C14     | 1.50844 | 1.19743  | 0.94382  | 0.8615 | 8               | 8d      |
|                      | C15     | 1.48300 | 1.15082  | 0.87651  | 0.8615 | 8               | 8d      |
|                      | C16     | 1.47693 | 1.08410  | 0.90476  | 0.8615 | 8               | 8d      |

**Table S6** Atomic parameters of Py-Fe/Ga-Z derived from synchrotron PXRD.

| Species              | Atom    | x        | y        | z       | SOF    | B <sub>eq</sub> | Wyckoff |
|----------------------|---------|----------|----------|---------|--------|-----------------|---------|
| Zeolite<br>framework | O1      | 0.38268  | 0.03934  | 0.77104 | 1      | 2.1229          | 8d      |
|                      | O2      | 0.31300  | 0.05796  | 0.92671 | 1      | 2.1229          | 8d      |
|                      | O3      | 0.20511  | 0.05954  | 0.01852 | 1      | 2.1229          | 8d      |
|                      | O4      | 0.09447  | 0.06888  | 0.92945 | 1      | 2.1229          | 8d      |
|                      | O5      | 0.12441  | 0.04678  | 0.72699 | 1      | 2.1229          | 8d      |
|                      | O6      | 0.24949  | 0.06889  | 0.75204 | 1      | 2.1229          | 8d      |
|                      | O7      | 0.38450  | 0.84531  | 0.76885 | 1      | 2.1229          | 8d      |
|                      | O8      | 0.30274  | 0.83968  | 0.91213 | 1      | 2.1229          | 8d      |
|                      | O9      | 0.17806  | 0.84774  | 0.03699 | 1      | 2.1229          | 8d      |
|                      | O10     | 0.08236  | 0.84801  | 0.92496 | 1      | 2.1229          | 8d      |
|                      | O11     | 0.12400  | 0.84654  | 0.73464 | 1      | 2.1229          | 8d      |
|                      | O12     | 0.24606  | 0.84447  | 0.78334 | 1      | 2.1229          | 8d      |
|                      | O13     | 0.31719  | 0.94580  | 0.82964 | 1      | 2.1229          | 8d      |
|                      | O14     | 0.07406  | 0.95174  | 0.81895 | 1      | 2.1229          | 8d      |
|                      | O15     | 0.41565  | 0.12973  | 0.59613 | 1      | 2.1229          | 8d      |
|                      | O16     | 0.40656  | 0.98884  | 0.59120 | 1      | 2.1229          | 8d      |
|                      | O17     | 0.39583  | 0.85995  | 0.54944 | 1      | 2.1229          | 8d      |
|                      | O18     | 0.19785  | 0.13575  | 0.63850 | 1      | 2.1229          | 8d      |
|                      | O19     | 0.19555  | -0.00584 | 0.60311 | 1      | 2.1229          | 8d      |
|                      | O20     | 0.20627  | 0.85657  | 0.60028 | 1      | 2.1229          | 8d      |
|                      | O21     | 1.00118  | 0.05020  | 0.79470 | 1      | 2.1229          | 8d      |
|                      | O22     | 0.99382  | 0.84499  | 0.77493 | 1      | 2.1229          | 8d      |
|                      | O23     | 0.42618  | 0.75000  | 0.66379 | 1      | 2.1229          | 4c      |
|                      | O24     | 0.20461  | 0.75000  | 0.64077 | 1      | 2.1229          | 4c      |
|                      | O25     | 0.28291  | 0.75000  | 0.07395 | 1      | 2.1229          | 4c      |
|                      | O26     | 0.10080  | 0.75000  | 0.08383 | 1      | 2.1229          | 4c      |
|                      | Si1     | 0.42004  | 0.05590  | 0.67607 | 1      | 1.0615          | 8d      |
|                      | Si2     | 0.31375  | 0.03331  | 0.82453 | 1      | 1.0615          | 8d      |
|                      | Si3     | 0.27790  | 0.05802  | 0.03514 | 1      | 1.0615          | 8d      |
|                      | Si4     | 0.12600  | 0.06903  | 0.02551 | 1      | 1.0615          | 8d      |
|                      | Si5     | 0.07350  | 0.03000  | 0.81142 | 1      | 1.0615          | 8d      |
|                      | Si6     | 0.18643  | 0.05876  | 0.67353 | 1.3352 | 1.0615          | 8d      |
| Si7                  | 0.42408 | 0.82079  | 0.67652  | 1       | 1.0615 | 8d              |         |
| Si8                  | 0.31398 | 0.86789  | 0.82429  | 1       | 1.0615 | 8d              |         |
| Si9                  | 0.27296 | 0.83727  | 0.02946  | 1       | 1.0615 | 8d              |         |
| Si10                 | 0.11590 | 0.82225  | 0.04499  | 1       | 1.0615 | 8d              |         |
| Si11                 | 0.07819 | 0.87413  | 0.80908  | 1       | 1.0615 | 8d              |         |
| Si12                 | 0.19243 | 0.82855  | 0.69073  | 1       | 1.0615 | 8d              |         |
| Pyridine1            | C1      | 0.03586  | -0.26355 | 0.35748 | 0.5843 | 8               | 8d      |
|                      | C2      | -0.03098 | -0.24679 | 0.36829 | 0.5843 | 8               | 8d      |
|                      | C3      | -0.04886 | -0.19467 | 0.43145 | 0.5843 | 8               | 8d      |
|                      | C4      | -0.00080 | -0.15914 | 0.48387 | 0.5843 | 8               | 8d      |
|                      | C5      | 0.06603  | -0.17591 | 0.47304 | 0.5843 | 8               | 8d      |
|                      | C6      | 0.08389  | -0.22804 | 0.40988 | 0.5843 | 8               | 8d      |

**Table S7** Atomic parameters of Py-Fe/B-Z derived from synchrotron PXRD.

| Species              | Atom | x        | y        | z       | SOF    | B <sub>eq</sub> | Wyckoff |
|----------------------|------|----------|----------|---------|--------|-----------------|---------|
| Zeolite<br>framework | O1   | 0.37686  | 0.04813  | 0.75883 | 1      | 1.3739          | 8d      |
|                      | O2   | 0.31082  | 0.05507  | 0.91713 | 1      | 1.3739          | 8d      |
|                      | O3   | 0.20112  | 0.06355  | 0.00433 | 1      | 1.3739          | 8d      |
|                      | O4   | 0.10336  | 0.06510  | 0.93051 | 1      | 1.3739          | 8d      |
|                      | O5   | 0.11462  | 0.05350  | 0.71909 | 1      | 1.3739          | 8d      |
|                      | O6   | 0.23998  | 0.07514  | 0.77006 | 1      | 1.3739          | 8d      |
|                      | O7   | 0.38211  | 0.84393  | 0.78430 | 1      | 1.3739          | 8d      |
|                      | O8   | 0.30744  | 0.82999  | 0.91451 | 1      | 1.3739          | 8d      |
|                      | O9   | 0.18633  | 0.85661  | 0.04354 | 1      | 1.3739          | 8d      |
|                      | O10  | 0.07853  | 0.85774  | 0.91971 | 1      | 1.3739          | 8d      |
|                      | O11  | 0.12928  | 0.83790  | 0.73223 | 1      | 1.3739          | 8d      |
|                      | O12  | 0.24089  | 0.85367  | 0.76425 | 1      | 1.3739          | 8d      |
|                      | O13  | 0.31564  | 0.95104  | 0.81424 | 1      | 1.3739          | 8d      |
|                      | O14  | 0.07100  | 0.94595  | 0.81238 | 1      | 1.3739          | 8d      |
|                      | O15  | 0.41916  | 0.13031  | 0.60349 | 1      | 1.3739          | 8d      |
|                      | O16  | 0.40138  | 1.00008  | 0.56399 | 1      | 1.3739          | 8d      |
|                      | O17  | 0.39111  | 0.85156  | 0.53447 | 1      | 1.3739          | 8d      |
|                      | O18  | 0.19802  | 0.13670  | 0.62161 | 1      | 1.3739          | 8d      |
|                      | O19  | 0.19283  | 0.00538  | 0.59552 | 1      | 1.3739          | 8d      |
|                      | O20  | 0.20297  | 0.86667  | 0.59320 | 1      | 1.3739          | 8d      |
|                      | O21  | 0.99966  | 0.05396  | 0.78808 | 1      | 1.3739          | 8d      |
|                      | O22  | 1.00021  | 0.86091  | 0.76028 | 1      | 1.3739          | 8d      |
|                      | O23  | 0.43089  | 0.75000  | 0.67678 | 1      | 1.3739          | 4c      |
|                      | O24  | 0.20800  | 0.75000  | 0.65755 | 1      | 1.3739          | 4c      |
|                      | O25  | 0.27639  | 0.75000  | 0.06768 | 1      | 1.3739          | 4c      |
|                      | O26  | 0.10781  | 0.75000  | 0.06329 | 1      | 1.3739          | 4c      |
| Pyridine1            | Si1  | 0.42603  | 0.04914  | 0.66672 | 1      | 0.6870          | 8d      |
|                      | Si2  | 0.31552  | 0.03263  | 0.83019 | 1.2786 | 0.6870          | 8d      |
|                      | Si3  | 0.27740  | 0.04952  | 0.03991 | 1      | 0.6870          | 8d      |
|                      | Si4  | 0.12019  | 0.06579  | 0.03123 | 1      | 0.6870          | 8d      |
|                      | Si5  | 0.07302  | 0.03374  | 0.81956 | 1      | 0.6870          | 8d      |
|                      | Si6  | 0.18431  | 0.06092  | 0.66666 | 1      | 0.6870          | 8d      |
|                      | Si7  | 0.42603  | 0.82580  | 0.66790 | 1      | 0.6870          | 8d      |
|                      | Si8  | 0.31308  | 0.87107  | 0.81985 | 1      | 0.6870          | 8d      |
|                      | Si9  | 0.26675  | 0.83436  | 0.03648 | 1      | 0.6870          | 8d      |
|                      | Si10 | 0.11622  | 0.82232  | 0.03135 | 1      | 0.6870          | 8d      |
|                      | Si11 | 0.07850  | 0.86881  | 0.80555 | 1      | 0.6870          | 8d      |
|                      | Si12 | 0.19522  | 0.83413  | 0.68868 | 1      | 0.6870          | 8d      |
| Pyridine1            | C1   | 0.04470  | -0.23737 | 0.30234 | 0.4561 | 8               | 8d      |
|                      | C2   | -0.02150 | -0.25693 | 0.31341 | 0.4561 | 8               | 8d      |
|                      | C3   | -0.04038 | -0.29362 | 0.39692 | 0.4561 | 8               | 8d      |
|                      | C4   | 0.00606  | -0.31097 | 0.46940 | 0.4561 | 8               | 8d      |
|                      | C5   | 0.07226  | -0.29141 | 0.45831 | 0.4561 | 8               | 8d      |
|                      | C6   | 0.09112  | -0.25472 | 0.37479 | 0.4561 | 8               | 8d      |



**Table S8** Atomic parameters of Py-Cu/Al-Z derived from synchrotron PXRD.

| Species              | Atom    | x       | y        | z        | SOF     | B <sub>eq</sub> | Wyckoff |
|----------------------|---------|---------|----------|----------|---------|-----------------|---------|
| Zeolite<br>framework | O1      | 0.37683 | 0.04816  | 0.74754  | 1       | 1.73028         | 8d      |
|                      | O2      | 0.29809 | 0.05837  | 0.92673  | 1       | 1.73028         | 8d      |
|                      | O3      | 0.21354 | 0.05358  | 0.04447  | 1       | 1.73028         | 8d      |
|                      | O4      | 0.08659 | 0.05702  | 0.90951  | 1       | 1.73028         | 8d      |
|                      | O5      | 0.11294 | 0.03731  | 0.72367  | 1       | 1.73028         | 8d      |
|                      | O6      | 0.25456 | 0.05534  | 0.74653  | 1       | 1.73028         | 8d      |
|                      | O7      | 0.37972 | 0.83551  | 0.76924  | 1       | 1.73028         | 8d      |
|                      | O8      | 0.30661 | 0.85235  | 0.91195  | 1       | 1.73028         | 8d      |
|                      | O9      | 0.21161 | 0.84457  | 0.01736  | 1       | 1.73028         | 8d      |
|                      | O10     | 0.09950 | 0.84568  | 0.89937  | 1       | 1.73028         | 8d      |
|                      | O11     | 0.12851 | 0.84325  | 0.73351  | 1       | 1.73028         | 8d      |
|                      | O12     | 0.24376 | 0.85654  | 0.75179  | 1       | 1.73028         | 8d      |
|                      | O13     | 0.29490 | 0.93761  | 0.82243  | 1       | 1.73028         | 8d      |
|                      | O14     | 0.06969 | 0.94733  | 0.82745  | 1       | 1.73028         | 8d      |
|                      | O15     | 0.40670 | 0.13603  | 0.60248  | 1       | 1.73028         | 8d      |
|                      | O16     | 0.40599 | 0.99239  | 0.58265  | 1       | 1.73028         | 8d      |
|                      | O17     | 0.39184 | 0.85596  | 0.56116  | 1       | 1.73028         | 8d      |
|                      | O18     | 0.18491 | 0.13497  | 0.62303  | 1       | 1.73028         | 8d      |
|                      | O19     | 0.18690 | 0.00013  | 0.60171  | 1       | 1.73028         | 8d      |
|                      | O20     | 0.20119 | 0.86092  | 0.58828  | 1       | 1.73028         | 8d      |
|                      | O21     | 0.99829 | 0.04366  | 0.79344  | 1       | 1.73028         | 8d      |
|                      | O22     | 0.98284 | 0.84344  | 0.79409  | 1       | 1.73028         | 8d      |
|                      | O23     | 0.42394 | 0.75000  | 0.63228  | 1       | 1.73028         | 4c      |
|                      | O24     | 0.19235 | 0.75000  | 0.62993  | 1       | 1.73028         | 4c      |
|                      | O25     | 0.29512 | 0.75000  | 0.06288  | 1       | 1.73028         | 4c      |
|                      | O26     | 0.08843 | 0.75000  | 0.07474  | 1       | 1.73028         | 4c      |
|                      | Si1     | 0.41990 | 0.05046  | 0.66656  | 1       | 0.86514         | 8d      |
|                      | Si2     | 0.30985 | 0.03005  | 0.82155  | 1       | 0.86514         | 8d      |
|                      | Si3     | 0.28108 | 0.06204  | 0.03101  | 1       | 0.86514         | 8d      |
|                      | Si4     | 0.12670 | 0.06599  | 0.01801  | 1       | 0.86514         | 8d      |
|                      | Si5     | 0.07896 | 0.03510  | 0.80796  | 1       | 0.86514         | 8d      |
|                      | Si6     | 0.18143 | 0.05175  | 0.67912  | 1       | 0.86514         | 8d      |
| Si7                  | 0.42141 | 0.82333 | 0.67058  | 1        | 0.86514 | 8d              |         |
| Si8                  | 0.31151 | 0.87186 | 0.81409  | 1        | 0.86514 | 8d              |         |
| Si9                  | 0.28364 | 0.82978 | 0.01591  | 1        | 0.86514 | 8d              |         |
| Si10                 | 0.12084 | 0.82212 | 0.03599  | 1        | 0.86514 | 8d              |         |
| Si11                 | 0.06746 | 0.86416 | 0.81743  | 1        | 0.86514 | 8d              |         |
| Si12                 | 0.18891 | 0.82671 | 0.66548  | 1.2588   | 0.86514 | 8d              |         |
| Pyridine1            | C1      | 0.43910 | -0.61872 | -0.10331 | 0.7707  | 8               | 8d      |
|                      | C2      | 0.45177 | -0.68734 | -0.10663 | 0.7707  | 8               | 8d      |
|                      | C3      | 0.49518 | -0.71558 | -0.03825 | 0.7707  | 8               | 8d      |
|                      | C4      | 0.52603 | -0.67611 | 0.03329  | 0.7707  | 8               | 8d      |
|                      | C5      | 0.51335 | -0.60750 | 0.03659  | 0.7707  | 8               | 8d      |
|                      | C6      | 0.46994 | -0.57927 | -0.03179 | 0.7707  | 8               | 8d      |

**Table S9** Atomic parameters of Py-Cu/Ga-Z derived from synchrotron PXRD.

| Species              | Atom    | x        | y       | z        | SOF     | B <sub>eq</sub> | Wyckoff |
|----------------------|---------|----------|---------|----------|---------|-----------------|---------|
| Zeolite<br>framework | O1      | 0.37115  | 0.05338 | 0.73877  | 1       | 1.73028         | 8d      |
|                      | O2      | 0.29811  | 0.06846 | 0.91865  | 1       | 1.73028         | 8d      |
|                      | O3      | 0.20658  | 0.05291 | 0.02585  | 1       | 1.73028         | 8d      |
|                      | O4      | 0.09055  | 0.06139 | 0.91139  | 1       | 1.73028         | 8d      |
|                      | O5      | 0.11633  | 0.06366 | 0.71292  | 1       | 1.73028         | 8d      |
|                      | O6      | 0.24231  | 0.06636 | 0.75527  | 1       | 1.73028         | 8d      |
|                      | O7      | 0.37792  | 0.82977 | 0.76290  | 1       | 1.73028         | 8d      |
|                      | O8      | 0.31106  | 0.84951 | 0.90643  | 1       | 1.73028         | 8d      |
|                      | O9      | 0.19279  | 0.84983 | 0.01429  | 1       | 1.73028         | 8d      |
|                      | O10     | 0.09498  | 0.84282 | 0.92890  | 1       | 1.73028         | 8d      |
|                      | O11     | 0.10994  | 0.84340 | 0.71516  | 1       | 1.73028         | 8d      |
|                      | O12     | 0.24678  | 0.86012 | 0.74223  | 1       | 1.73028         | 8d      |
|                      | O13     | 0.30036  | 0.94221 | 0.80679  | 1       | 1.73028         | 8d      |
|                      | O14     | 0.06981  | 0.95310 | 0.82639  | 1       | 1.73028         | 8d      |
|                      | O15     | 0.41049  | 0.11876 | 0.59935  | 1       | 1.73028         | 8d      |
|                      | O16     | 0.41309  | 0.99160 | 0.60043  | 1       | 1.73028         | 8d      |
|                      | O17     | 0.40538  | 0.87180 | 0.56497  | 1       | 1.73028         | 8d      |
|                      | O18     | 0.19275  | 0.13100 | 0.61485  | 1       | 1.73028         | 8d      |
|                      | O19     | 0.19208  | 0.00555 | 0.58138  | 1       | 1.73028         | 8d      |
|                      | O20     | 0.19447  | 0.86146 | 0.57770  | 1       | 1.73028         | 8d      |
|                      | O21     | 0.99912  | 0.05077 | 0.77639  | 1       | 1.73028         | 8d      |
|                      | O22     | 1.00011  | 0.84962 | 0.79174  | 1       | 1.73028         | 8d      |
| O23                  | 0.41884 | 0.75000  | 0.66564 | 1        | 1.73028 | 4c              |         |
| O24                  | 0.18917 | 0.75000  | 0.64342 | 1        | 1.73028 | 4c              |         |
| O25                  | 0.28740 | 0.75000  | 0.05324 | 1        | 1.73028 | 4c              |         |
| O26                  | 0.10720 | 0.75000  | 0.06186 | 1        | 1.73028 | 4c              |         |
| Si1                  | 0.42528 | 0.05528  | 0.66165 | 1        | 0.86514 | 8d              |         |
| Si2                  | 0.30748 | 0.03036  | 0.81113 | 1        | 0.86514 | 8d              |         |
| Si3                  | 0.28124 | 0.05841  | 0.02461 | 1        | 0.86514 | 8d              |         |
| Si4                  | 0.12326 | 0.06258  | 0.01881 | 1        | 0.86514 | 8d              |         |
| Si5                  | 0.07288 | 0.02706  | 0.80679 | 1        | 0.86514 | 8d              |         |
| Si6                  | 0.18729 | 0.06060  | 0.67089 | 1.3346   | 0.86514 | 8d              |         |
| Si7                  | 0.42449 | 0.82800  | 0.66878 | 1        | 0.86514 | 8d              |         |
| Si8                  | 0.30633 | 0.87313  | 0.80566 | 1        | 0.86514 | 8d              |         |
| Si9                  | 0.27574 | 0.83032  | 0.01955 | 1        | 0.86514 | 8d              |         |
| Si10                 | 0.11869 | 0.82598  | 0.03602 | 1        | 0.86514 | 8d              |         |
| Si11                 | 0.07019 | 0.86645  | 0.81723 | 1        | 0.86514 | 8d              |         |
| Si12                 | 0.18497 | 0.82688  | 0.67716 | 1        | 0.86514 | 8d              |         |
| Pyridine1            | C1      | 0.05862  | 0.73253 | -0.66085 | 0.4879  | 8               | 8d      |
|                      | C2      | 0.08377  | 0.67720 | -0.60975 | 0.4879  | 8               | 8d      |
|                      | C3      | 0.04579  | 0.64725 | -0.53577 | 0.4879  | 8               | 8d      |
|                      | C4      | -0.01694 | 0.67190 | -0.51229 | 0.4879  | 8               | 8d      |
|                      | C5      | -0.04207 | 0.72723 | -0.56340 | 0.4879  | 8               | 8d      |
|                      | C6      | -0.00408 | 0.75717 | -0.63737 | 0.4879  | 8               | 8d      |

**Table S10** Atomic parameters of Py-Cu/B-Z derived from synchrotron PXRD.

| Species              | Atom    | x        | y        | z       | SOF    | B <sub>eq</sub> | Wyckoff |
|----------------------|---------|----------|----------|---------|--------|-----------------|---------|
| Zeolite<br>framework | O1      | 0.37508  | 0.06038  | 0.75351 | 1      | 2.2312          | 8d      |
|                      | O2      | 0.30733  | 0.05869  | 0.92335 | 1      | 2.2312          | 8d      |
|                      | O3      | 0.20230  | 0.05912  | 0.02514 | 1      | 2.2312          | 8d      |
|                      | O4      | 0.09469  | 0.06431  | 0.91276 | 1      | 2.2312          | 8d      |
|                      | O5      | 0.11415  | 0.05582  | 0.72545 | 1      | 2.2312          | 8d      |
|                      | O6      | 0.24312  | 0.04591  | 0.74803 | 1      | 2.2312          | 8d      |
|                      | O7      | 0.37226  | 0.84182  | 0.76217 | 1      | 2.2312          | 8d      |
|                      | O8      | 0.30750  | 0.84712  | 0.92267 | 1      | 2.2312          | 8d      |
|                      | O9      | 0.19684  | 0.84769  | 0.02825 | 1      | 2.2312          | 8d      |
|                      | O10     | 0.08685  | 0.83435  | 0.92849 | 1      | 2.2312          | 8d      |
|                      | O11     | 0.11645  | 0.84412  | 0.72622 | 1      | 2.2312          | 8d      |
|                      | O12     | 0.24474  | 0.84269  | 0.76831 | 1      | 2.2312          | 8d      |
|                      | O13     | 0.31583  | 0.95031  | 0.81533 | 1      | 2.2312          | 8d      |
|                      | O14     | 0.08271  | 0.94847  | 0.82126 | 1      | 2.2312          | 8d      |
|                      | O15     | 0.41965  | 0.13151  | 0.60694 | 1      | 2.2312          | 8d      |
|                      | O16     | 0.41241  | 0.99690  | 0.58170 | 1      | 2.2312          | 8d      |
|                      | O17     | 0.39948  | 0.86931  | 0.57510 | 1      | 2.2312          | 8d      |
|                      | O18     | 0.19420  | 0.13006  | 0.61971 | 1      | 2.2312          | 8d      |
|                      | O19     | 0.19092  | 0.00208  | 0.58938 | 1      | 2.2312          | 8d      |
|                      | O20     | 0.19728  | 0.86770  | 0.58179 | 1      | 2.2312          | 8d      |
|                      | O21     | 0.99691  | 0.04943  | 0.79070 | 1      | 2.2312          | 8d      |
|                      | O22     | 0.99689  | 0.85216  | 0.78442 | 1      | 2.2312          | 8d      |
|                      | O23     | 0.42376  | 0.75000  | 0.65543 | 1      | 2.2312          | 4c      |
|                      | O24     | 0.19367  | 0.75000  | 0.64587 | 1      | 2.2312          | 4c      |
|                      | O25     | 0.28429  | 0.75000  | 0.06250 | 1      | 2.2312          | 4c      |
|                      | O26     | 0.10859  | 0.75000  | 0.05833 | 1      | 2.2312          | 4c      |
|                      | Si1     | 0.42321  | 0.05822  | 0.66328 | 1      | 1.1156          | 8d      |
|                      | Si2     | 0.30949  | 0.02954  | 0.81041 | 1      | 1.1156          | 8d      |
|                      | Si3     | 0.27936  | 0.06171  | 0.03265 | 1      | 1.1156          | 8d      |
|                      | Si4     | 0.12076  | 0.06316  | 0.02537 | 1      | 1.1156          | 8d      |
|                      | Si5     | 0.07167  | 0.02922  | 0.81379 | 1      | 1.1156          | 8d      |
|                      | Si6     | 0.18663  | 0.05912  | 0.67035 | 1      | 1.1156          | 8d      |
| Si7                  | 0.42420 | 0.82784  | 0.67272  | 1       | 1.1156 | 8d              |         |
| Si8                  | 0.30723 | 0.86909  | 0.81622  | 1       | 1.1156 | 8d              |         |
| Si9                  | 0.27286 | 0.82842  | 0.03087  | 1       | 1.1156 | 8d              |         |
| Si10                 | 0.11989 | 0.82699  | 0.03182  | 1       | 1.1156 | 8d              |         |
| Si11                 | 0.07201 | 0.87121  | 0.81751  | 1       | 1.1156 | 8d              |         |
| Si12                 | 0.18796 | 0.82687  | 0.68439  | 1.0842  | 1.1156 | 8d              |         |
| Pyridine1            | C1      | -0.04342 | -0.22608 | 0.45025 | 0.3862 | 8               | 8d      |
|                      | C2      | -0.01757 | -0.16891 | 0.49685 | 0.3862 | 8               | 8d      |
|                      | C3      | 0.04681  | -0.14797 | 0.47449 | 0.3862 | 8               | 8d      |
|                      | C4      | 0.08561  | -0.18343 | 0.40621 | 0.3862 | 8               | 8d      |
|                      | C5      | 0.05975  | -0.24060 | 0.35962 | 0.3862 | 8               | 8d      |
|                      | C6      | -0.00464 | -0.26153 | 0.38200 | 0.3862 | 8               | 8d      |

**Table S11.** Occupancies of different T sites for Fe/X-Z by Rietveld refinement.

| Occupancies | Fe/Al-Z       | Fe/Ga-Z       | Fe/B-Z        |
|-------------|---------------|---------------|---------------|
| T1          | 1.3364        | 1.1594        | 0.9679        |
| T2          | 1.2157        | 1.2235        | <b>1.2786</b> |
| T3          | 1.1597        | 1.1788        | 1.1410        |
| T4          | 0.8413        | 0.9102        | 0.6391        |
| T5          | 0.9910        | 1.1033        | 1.0068        |
| T6          | <b>1.4655</b> | <b>1.3352</b> | 1.2703        |
| T7          | 0.6662        | 0.7214        | 0.6399        |
| T8          | 1.1055        | 1.0372        | 1.2354        |
| T9          | 1.1902        | 1.1406        | 1.2216        |
| T10         | 0.9400        | 0.8666        | 0.8288        |
| T11         | 0.7569        | 0.8250        | 0.9490        |
| T12         | 0.9840        | 0.9800        | 1.0955        |

**Table S12.** Occupancies of different T sites for Cu/X-Z by Rietveld refinement.

| Occupancies | Cu/Al-Z       | Cu/Ga-Z       | Cu/B-Z        |
|-------------|---------------|---------------|---------------|
| T1          | 1.0790        | 1.1871        | 1.0000        |
| T2          | 1.1216        | 1.0289        | 1.0483        |
| T3          | 1.0290        | 1.0604        | 1.0010        |
| T4          | 1.0002        | 1.0002        | 1.0003        |
| T5          | 1.1109        | 1.1277        | 1.0148        |
| T6          | 1.1861        | <b>1.3346</b> | 1.0617        |
| T7          | 1.0574        | 1.0001        | 1.0098        |
| T8          | 1.1698        | 1.0457        | 1.0389        |
| T9          | 1.1310        | 1.1031        | 1.0461        |
| T10         | 1.0514        | 1.0088        | 1.0070        |
| T11         | 1.0263        | 1.0000        | 1.0005        |
| T12         | <b>1.2588</b> | 1.1170        | <b>1.0842</b> |

**Table S13.** Fitting parameters for Fe K-edge EXAFS for the sample labelled.

| Sample | Path | C.N.      | R/Å           | $\sigma^2$ | $\Delta E$ | R-factor | k-range/Å <sup>-1</sup> |
|--------|------|-----------|---------------|------------|------------|----------|-------------------------|
| Fe/Al  | Fe–O | 1.32 (8)  | 1.873(10)     | 0.0009(90) | -0.5 (4)   | 0.009    | 3-11                    |
| Fe/Al  | Fe–O | 3.06 (8)  | 2.059 (5)     | 0.0062(51) | -0.5 (4)   | 0.009    | 3-11                    |
| Fe/Al  | Fe–O | 4.44 (41) | 3.001(13)     | 0.0210(86) | -0.5 (4)   | 0.009    | 3-11                    |
| Fe/Ga  | Fe–O | 3.01 (11) | 1.825 (8)     | 0.0027(15) | -9.1 (5)   | 0.004    | 3-11                    |
| Fe/B   | Fe–O | 2.01 (6)  | 1.872(31)     | 0.0016(16) | -2.2 (3)   | 0.003    | 3-11                    |
| Fe/B   | Fe–O | 2.40 (5)  | 2.059 (4)     | 0.0022(27) | -2.2 (3)   | 0.003    | 3-11                    |
| Fe/B   | Fe–O | 4.88 (39) | 2.974<br>(11) | 0.0260(86) | -2.2 (3)   | 0.003    | 3-11                    |

C.N. is the average coordination number around the central atoms. R and  $\sigma^2$  are the average path length (Å) and the Debye factor (Å<sup>2</sup>), respectively. The  $\Delta E_0$  values of the first shell are constrained to share the same value in the fitting models. The  $s_0^2$  was fixed as 0.9 for all fitting.

**Table S14.** Fitting parameters for Cu K-edge EXAFS for the sample labeled.

| Sample | Path   | C.N.   | R/Å       | $\sigma^2$ | $\Delta E$ | R-factor | k-range/Å <sup>-1</sup> |
|--------|--------|--------|-----------|------------|------------|----------|-------------------------|
| Cu/Al  | Cu–N/O | 3.3(1) | 1.959(7)  | 0.027(1)   | -0.8(4)    | 0.008    | 3-11                    |
| Cu/Al  | Cu–N/O | 1.7(4) | 2.864(21) | 0.005      | -0.8(4)    | 0.008    | 3-11                    |
| Cu/Ga  | Cu–N/O | 3.0(2) | 1.950(10) | 0.003(2)   | -1.1(5)    | 0.020    | 3-11                    |
| Cu/Ga  | Cu–N/O | 1.6(4) | 2.932(24) | 0.002      | -1.1(5)    | 0.020    | 3-11                    |
| Cu/B   | Cu–N/O | 3.3(1) | 1.952(7)  | 0.003(1)   | -2.3(3)    | 0.006    | 3-11                    |
| Cu/B   | Cu–N/O | 2.4(3) | 2.846(14) | 0.008(6)   | -2.3(3)    | 0.006    | 3-11                    |

C.N. is the average coordination number around the central atoms. R and  $\sigma^2$  are the average path length (Å) and the Debye factor (Å<sup>2</sup>), respectively. The  $\Delta E_0$  values of the first shell are constrained to share the same value in the fitting models. The  $s_0^2$  was fixed as 0.9 for all fitting.

**Table S15.** Atomic parameters of Fe/Al-Z derived from synchrotron PXRD.

| Species              | Atom    | x       | y        | z       | SOF     | B <sub>eq</sub> | Wyckoff |
|----------------------|---------|---------|----------|---------|---------|-----------------|---------|
| Zeolite<br>framework | O1      | 0.37995 | 0.06505  | 0.77466 | 1       | 1.2             | 8d      |
|                      | O2      | 0.29840 | 0.06294  | 0.93825 | 1       | 1.2             | 8d      |
|                      | O3      | 0.20062 | 0.05667  | 0.01049 | 1       | 1.2             | 8d      |
|                      | O4      | 0.09196 | 0.04483  | 0.91863 | 1       | 1.2             | 8d      |
|                      | O5      | 0.11423 | 0.05946  | 0.74148 | 1       | 1.2             | 8d      |
|                      | O6      | 0.25062 | 0.06483  | 0.74034 | 1       | 1.2             | 8d      |
|                      | O7      | 0.41931 | 0.84891  | 0.73863 | 1       | 1.2             | 8d      |
|                      | O8      | 0.31426 | 0.84127  | 0.93028 | 1       | 1.2             | 8d      |
|                      | O9      | 0.16434 | 0.83846  | 0.02039 | 1       | 1.2             | 8d      |
|                      | O10     | 0.11745 | 0.87118  | 0.92897 | 1       | 1.2             | 8d      |
|                      | O11     | 0.11951 | 0.85409  | 0.74143 | 1       | 1.2             | 8d      |
|                      | O12     | 0.27462 | 0.85547  | 0.77080 | 1       | 1.2             | 8d      |
|                      | O13     | 0.31258 | 0.99712  | 0.80324 | 1       | 1.2             | 8d      |
|                      | O14     | 0.07323 | 0.87609  | 0.80518 | 1       | 1.2             | 8d      |
|                      | O15     | 0.40009 | 0.25031  | 0.60888 | 1       | 1.2             | 8d      |
|                      | O16     | 0.40615 | 0.97417  | 0.59746 | 1       | 1.2             | 8d      |
|                      | O17     | 0.39894 | 0.88471  | 0.57718 | 1       | 1.2             | 8d      |
|                      | O18     | 0.19543 | 0.13149  | 0.62111 | 1       | 1.2             | 8d      |
|                      | O19     | 0.18527 | -0.00006 | 0.57673 | 1       | 1.2             | 8d      |
|                      | O20     | 0.19536 | 0.85570  | 0.58349 | 1       | 1.2             | 8d      |
|                      | O21     | 1.00277 | 0.06246  | 0.79792 | 1       | 1.2             | 8d      |
|                      | O22     | 0.99991 | 0.84253  | 0.79040 | 1       | 1.2             | 8d      |
|                      | O23     | 0.42805 | 0.75000  | 0.67261 | 1       | 1.2             | 4c      |
|                      | O24     | 0.19073 | 0.75000  | 0.63547 | 1       | 1.2             | 4c      |
|                      | O25     | 0.32987 | 0.75000  | 0.05097 | 1       | 1.2             | 4c      |
|                      | O26     | 0.11494 | 0.75000  | 0.04384 | 1       | 1.2             | 4c      |
|                      | Si1     | 0.42871 | 0.06027  | 0.65935 | 1       | 0.6             | 8d      |
|                      | Si2     | 0.31207 | 0.03855  | 0.81976 | 1       | 0.6             | 8d      |
|                      | Si3     | 0.27885 | 0.05952  | 0.03252 | 1       | 0.6             | 8d      |
|                      | Si4     | 0.12157 | 0.06155  | 0.04353 | 1       | 0.6             | 8d      |
|                      | Si5     | 0.06426 | 0.03098  | 0.81211 | 1       | 0.6             | 8d      |
|                      | Si6     | 0.19647 | 0.06422  | 0.67826 | 1.4655* | 0.6             | 8d      |
| Si7                  | 0.42832 | 0.82882 | 0.67608  | 1       | 0.6     | 8d              |         |
| Si8                  | 0.31083 | 0.86841 | 0.82170  | 1       | 0.6     | 8d              |         |
| Si9                  | 0.29063 | 0.82889 | 0.03312  | 1       | 0.6     | 8d              |         |
| Si10                 | 0.11895 | 0.82988 | 0.03223  | 1       | 0.6     | 8d              |         |
| Si11                 | 0.07387 | 0.86996 | 0.81198  | 1       | 0.6     | 8d              |         |
| Si12                 | 0.18908 | 0.82651 | 0.67832  | 1       | 0.6     | 8d              |         |

**Table S16.** Atomic parameters of Fe/Ga-Z derived from synchrotron PXRD.

| Species              | Atom    | x       | y        | z       | SOF    | B <sub>eq</sub> | Wyckoff |
|----------------------|---------|---------|----------|---------|--------|-----------------|---------|
| Zeolite<br>framework | O1      | 0.38133 | 0.05960  | 0.76617 | 1      | 1.4398          | 8d      |
|                      | O2      | 0.30580 | 0.06053  | 0.91424 | 1      | 1.4398          | 8d      |
|                      | O3      | 0.19432 | 0.06084  | 0.01228 | 1      | 1.4398          | 8d      |
|                      | O4      | 0.09846 | 0.06169  | 0.91886 | 1      | 1.4398          | 8d      |
|                      | O5      | 0.11918 | 0.05443  | 0.71804 | 1      | 1.4398          | 8d      |
|                      | O6      | 0.25548 | 0.04437  | 0.75660 | 1      | 1.4398          | 8d      |
|                      | O7      | 0.39208 | 0.84730  | 0.78530 | 1      | 1.4398          | 8d      |
|                      | O8      | 0.30764 | 0.84096  | 0.91430 | 1      | 1.4398          | 8d      |
|                      | O9      | 0.19398 | 0.84655  | 0.02954 | 1      | 1.4398          | 8d      |
|                      | O10     | 0.08007 | 0.85374  | 0.92174 | 1      | 1.4398          | 8d      |
|                      | O11     | 0.11128 | 0.84363  | 0.73470 | 1      | 1.4398          | 8d      |
|                      | O12     | 0.22848 | 0.83628  | 0.76170 | 1      | 1.4398          | 8d      |
|                      | O13     | 0.31080 | 0.93679  | 0.82497 | 1      | 1.4398          | 8d      |
|                      | O14     | 0.07270 | 0.93017  | 0.81185 | 1      | 1.4398          | 8d      |
|                      | O15     | 0.41660 | 0.13504  | 0.58744 | 1      | 1.4398          | 8d      |
|                      | O16     | 0.40266 | 0.99628  | 0.56227 | 1      | 1.4398          | 8d      |
|                      | O17     | 0.40404 | 0.86416  | 0.57133 | 1      | 1.4398          | 8d      |
|                      | O18     | 0.19309 | 0.14498  | 0.62759 | 1      | 1.4398          | 8d      |
|                      | O19     | 0.19514 | -0.01980 | 0.61480 | 1      | 1.4398          | 8d      |
|                      | O20     | 0.19471 | 0.85979  | 0.59974 | 1      | 1.4398          | 8d      |
| O21                  | 1.00748 | 0.04953 | 0.78963  | 1       | 1.4398 | 8d              |         |
| O22                  | 1.00359 | 0.85114 | 0.75091  | 1       | 1.4398 | 8d              |         |
| O23                  | 0.42003 | 0.75000 | 0.65462  | 1       | 1.4398 | 4c              |         |
| O24                  | 0.19853 | 0.75000 | 0.63479  | 1       | 1.4398 | 4c              |         |
| O25                  | 0.29195 | 0.75000 | 0.08286  | 1       | 1.4398 | 4c              |         |
| O26                  | 0.10733 | 0.75000 | 0.07404  | 1       | 1.4398 | 4c              |         |
| Si1                  | 0.42315 | 0.05762 | 0.67142  | 1       | 0.7199 | 8d              |         |
| Si2                  | 0.31296 | 0.03522 | 0.82653  | 1       | 0.7199 | 8d              |         |
| Si3                  | 0.28049 | 0.06251 | 0.03372  | 1       | 0.7199 | 8d              |         |
| Si4                  | 0.12151 | 0.06057 | 0.03645  | 1       | 0.7199 | 8d              |         |
| Si5                  | 0.07382 | 0.02748 | 0.81817  | 1       | 0.7199 | 8d              |         |
| Si6                  | 0.19081 | 0.06168 | 0.67409  | 1.3352* | 0.7199 | 8d              |         |
| Si7                  | 0.42749 | 0.83008 | 0.69250  | 1       | 0.7199 | 8d              |         |
| Si8                  | 0.30938 | 0.86737 | 0.82959  | 1       | 0.7199 | 8d              |         |
| Si9                  | 0.27677 | 0.82878 | 0.04337  | 1       | 0.7199 | 8d              |         |
| Si10                 | 0.11663 | 0.81993 | 0.03769  | 1       | 0.7199 | 8d              |         |
| Si11                 | 0.07222 | 0.86890 | 0.80191  | 1       | 0.7199 | 8d              |         |
| Si12                 | 0.18079 | 0.82814 | 0.67462  | 1       | 0.7199 | 8d              |         |

**Table S17.** Atomic parameters of Fe/B-Z derived from synchrotron PXRD.

| Species              | Atom    | x       | y       | z        | SOF    | B <sub>eq</sub> | Wyckoff |
|----------------------|---------|---------|---------|----------|--------|-----------------|---------|
| Zeolite<br>framework | O1      | 0.36796 | 0.05042 | 0.74038  | 1      | 0.9609          | 8d      |
|                      | O2      | 0.30322 | 0.06319 | 0.92658  | 1      | 0.9609          | 8d      |
|                      | O3      | 0.20163 | 0.05992 | 0.01475  | 1      | 0.9609          | 8d      |
|                      | O4      | 0.09144 | 0.03945 | 0.90694  | 1      | 0.9609          | 8d      |
|                      | O5      | 0.12457 | 0.07261 | 0.74069  | 1      | 0.9609          | 8d      |
|                      | O6      | 0.22629 | 0.06964 | 0.77696  | 1      | 0.9609          | 8d      |
|                      | O7      | 0.39382 | 0.83980 | 0.77672  | 1      | 0.9609          | 8d      |
|                      | O8      | 0.31058 | 0.83573 | 0.93479  | 1      | 0.9609          | 8d      |
|                      | O9      | 0.18804 | 0.84068 | -0.00241 | 1      | 0.9609          | 8d      |
|                      | O10     | 0.11011 | 0.84887 | 0.90099  | 1      | 0.9609          | 8d      |
|                      | O11     | 0.12777 | 0.84581 | 0.73324  | 1      | 0.9609          | 8d      |
|                      | O12     | 0.25737 | 0.84408 | 0.76581  | 1      | 0.9609          | 8d      |
|                      | O13     | 0.30304 | 0.93787 | 0.81241  | 1      | 0.9609          | 8d      |
|                      | O14     | 0.08562 | 0.95326 | 0.82506  | 1      | 0.9609          | 8d      |
|                      | O15     | 0.41559 | 0.13509 | 0.64600  | 1      | 0.9609          | 8d      |
|                      | O16     | 0.40494 | 0.98840 | 0.58940  | 1      | 0.9609          | 8d      |
|                      | O17     | 0.39952 | 0.86555 | 0.55371  | 1      | 0.9609          | 8d      |
|                      | O18     | 0.18533 | 0.12592 | 0.61261  | 1      | 0.9609          | 8d      |
|                      | O19     | 0.18412 | 0.03370 | 0.58815  | 1      | 0.9609          | 8d      |
|                      | O20     | 0.20354 | 0.85679 | 0.59221  | 1      | 0.9609          | 8d      |
| O21                  | 0.99431 | 0.04966 | 0.77471 | 1        | 0.9609 | 8d              |         |
| O22                  | 0.99423 | 0.84906 | 0.78463 | 1        | 0.9609 | 8d              |         |
| O23                  | 0.42449 | 0.75000 | 0.70717 | 1        | 0.9609 | 4c              |         |
| O24                  | 0.20688 | 0.75000 | 0.67519 | 1        | 0.9609 | 4c              |         |
| O25                  | 0.27058 | 0.75000 | 0.01086 | 1        | 0.9609 | 4c              |         |
| O26                  | 0.10459 | 0.75000 | 0.06982 | 1        | 0.9609 | 4c              |         |
| Si1                  | 0.41936 | 0.05714 | 0.67305 | 1        | 0.4804 | 8d              |         |
| Si2                  | 0.30802 | 0.02944 | 0.82280 | 1.2786*  | 0.4804 | 8d              |         |
| Si3                  | 0.28244 | 0.05460 | 0.04556 | 1        | 0.4804 | 8d              |         |
| Si4                  | 0.11743 | 0.06626 | 0.03184 | 1        | 0.4804 | 8d              |         |
| Si5                  | 0.07212 | 0.03750 | 0.81429 | 1        | 0.4804 | 8d              |         |
| Si6                  | 0.18327 | 0.04427 | 0.68045 | 1        | 0.4804 | 8d              |         |
| Si7                  | 0.42237 | 0.82315 | 0.66708 | 1        | 0.4804 | 8d              |         |
| Si8                  | 0.31068 | 0.87140 | 0.82534 | 1        | 0.4804 | 8d              |         |
| Si9                  | 0.27739 | 0.83304 | 0.02539 | 1        | 0.4804 | 8d              |         |
| Si10                 | 0.11548 | 0.82555 | 0.04495 | 1        | 0.4804 | 8d              |         |
| Si11                 | 0.07427 | 0.86774 | 0.81369 | 1        | 0.4804 | 8d              |         |
| Si12                 | 0.19103 | 0.82381 | 0.67879 | 1        | 0.4804 | 8d              |         |
| Water1               | O1      | 0.48146 | 0.36773 | 0.45202  | 0.5452 | 7               | 8d      |



**Table S18.** Atomic parameters of Cu/Al-Z derived from synchrotron PXRD.

| Species              | Atom    | x        | y        | z        | SOF    | Beq | Wyckoff |
|----------------------|---------|----------|----------|----------|--------|-----|---------|
| Zeolite<br>framework | O1      | 0.38292  | 0.05969  | 0.76470  | 1      | 1.2 | 8d      |
|                      | O2      | 0.30991  | 0.06035  | 0.91453  | 1      | 1.2 | 8d      |
|                      | O3      | 0.19925  | 0.04396  | 0.02637  | 1      | 1.2 | 8d      |
|                      | O4      | 0.09250  | 0.05904  | 0.93912  | 1      | 1.2 | 8d      |
|                      | O5      | 0.11301  | 0.06095  | 0.69945  | 1      | 1.2 | 8d      |
|                      | O6      | 0.24093  | 0.04684  | 0.75345  | 1      | 1.2 | 8d      |
|                      | O7      | 0.39521  | 0.85010  | 0.77988  | 1      | 1.2 | 8d      |
|                      | O8      | 0.31640  | 0.84709  | 0.89548  | 1      | 1.2 | 8d      |
|                      | O9      | 0.19990  | 0.84678  | 0.04076  | 1      | 1.2 | 8d      |
|                      | O10     | 0.09168  | 0.83705  | 0.93887  | 1      | 1.2 | 8d      |
|                      | O11     | 0.10799  | 0.84922  | 0.73094  | 1      | 1.2 | 8d      |
|                      | O12     | 0.23713  | 0.86111  | 0.78160  | 1      | 1.2 | 8d      |
|                      | O13     | 0.31313  | 0.93952  | 0.80765  | 1      | 1.2 | 8d      |
|                      | O14     | 0.07981  | 0.93925  | 0.83211  | 1      | 1.2 | 8d      |
|                      | O15     | 0.42831  | 0.15378  | 0.63664  | 1      | 1.2 | 8d      |
|                      | O16     | 0.39939  | 1.00792  | 0.57081  | 1      | 1.2 | 8d      |
|                      | O17     | 0.39321  | 0.86854  | 0.54115  | 1      | 1.2 | 8d      |
|                      | O18     | 0.18847  | 0.14147  | 0.61464  | 1      | 1.2 | 8d      |
|                      | O19     | 0.19712  | -0.00808 | 0.60575  | 1      | 1.2 | 8d      |
|                      | O20     | 0.20133  | 0.86754  | 0.59088  | 1      | 1.2 | 8d      |
|                      | O21     | 1.00052  | 0.06068  | 0.75599  | 1      | 1.2 | 8d      |
|                      | O22     | 1.00213  | 0.84925  | 0.79446  | 1      | 1.2 | 8d      |
|                      | O23     | 0.41989  | 0.75000  | 0.66265  | 1      | 1.2 | 4c      |
|                      | O24     | 0.19451  | 0.75000  | 0.60233  | 1      | 1.2 | 4c      |
| O25                  | 0.30322 | 0.75000  | 0.09781  | 1        | 1.2    | 4c  |         |
| O26                  | 0.08779 | 0.75000  | 0.08809  | 1        | 1.2    | 4c  |         |
| Si1                  | 0.42525 | 0.05959  | 0.68484  | 1        | 0.6    | 8d  |         |
| Si2                  | 0.31354 | 0.03220  | 0.82342  | 1        | 0.6    | 8d  |         |
| Si3                  | 0.27579 | 0.06253  | 0.02584  | 1        | 0.6    | 8d  |         |
| Si4                  | 0.12404 | 0.05455  | 0.01350  | 1        | 0.6    | 8d  |         |
| Si5                  | 0.07146 | 0.03555  | 0.81274  | 1        | 0.6    | 8d  |         |
| Si6                  | 0.19149 | 0.06400  | 0.67078  | 1        | 0.6    | 8d  |         |
| Si7                  | 0.42616 | 0.83196  | 0.66609  | 1        | 0.6    | 8d  |         |
| Si8                  | 0.31359 | 0.86384  | 0.82773  | 1        | 0.6    | 8d  |         |
| Si9                  | 0.28994 | 0.81987  | 0.02762  | 1        | 0.6    | 8d  |         |
| Si10                 | 0.12176 | 0.81615  | 0.04350  | 1        | 0.6    | 8d  |         |
| Si11                 | 0.06907 | 0.86692  | 0.80583  | 1        | 0.6    | 8d  |         |
| Si12                 | 0.18408 | 0.82669  | 0.68732  | 1.2588*  | 0.6    | 8d  |         |
| Water1               | O1      | 0.50920  | 0.25123  | -0.13938 | 0.4171 | 8   | 8d      |
| Water2               | O2      | 0.50697  | -0.02271 | -0.06333 | 0.3971 | 8   | 8d      |
| Water3               | O3      | -0.50826 | 0.16454  | -0.04125 | 0.7816 | 8   | 8d      |
| Water4               | O4      | -0.73969 | 0.24463  | -0.10154 | 0.6393 | 8   | 8d      |
| Water5               | O5      | -0.52583 | -0.21553 | -0.06154 | 0.4389 | 8   | 8d      |

**Table S19.** Atomic parameters of Cu/Ga-Z derived from synchrotron PXRD.

| Species              | Atom    | x       | y        | z        | SOF     | B <sub>eq</sub> | Wyckoff |
|----------------------|---------|---------|----------|----------|---------|-----------------|---------|
| Zeolite<br>framework | O1      | 0.37457 | 0.05369  | 0.77299  | 1       | 1.73028         | 8d      |
|                      | O2      | 0.30270 | 0.06622  | 0.91221  | 1       | 1.73028         | 8d      |
|                      | O3      | 0.20333 | 0.05209  | 0.01384  | 1       | 1.73028         | 8d      |
|                      | O4      | 0.09571 | 0.06158  | 0.92047  | 1       | 1.73028         | 8d      |
|                      | O5      | 0.11842 | 0.05225  | 0.71586  | 1       | 1.73028         | 8d      |
|                      | O6      | 0.24506 | 0.05807  | 0.75603  | 1       | 1.73028         | 8d      |
|                      | O7      | 0.39861 | 0.84194  | 0.78950  | 1       | 1.73028         | 8d      |
|                      | O8      | 0.31507 | 0.84758  | 0.90637  | 1       | 1.73028         | 8d      |
|                      | O9      | 0.18333 | 0.84471  | 0.02910  | 1       | 1.73028         | 8d      |
|                      | O10     | 0.08878 | 0.85064  | 0.90931  | 1       | 1.73028         | 8d      |
|                      | O11     | 0.10683 | 0.84985  | 0.74288  | 1       | 1.73028         | 8d      |
|                      | O12     | 0.23777 | 0.84202  | 0.75938  | 1       | 1.73028         | 8d      |
|                      | O13     | 0.30892 | 0.93744  | 0.82488  | 1       | 1.73028         | 8d      |
|                      | O14     | 0.07227 | 0.93686  | 0.82515  | 1       | 1.73028         | 8d      |
|                      | O15     | 0.41537 | 0.14335  | 0.62519  | 1       | 1.73028         | 8d      |
|                      | O16     | 0.39892 | 0.98777  | 0.56410  | 1       | 1.73028         | 8d      |
|                      | O17     | 0.40016 | 0.86953  | 0.56708  | 1       | 1.73028         | 8d      |
|                      | O18     | 0.19322 | 0.15115  | 0.62909  | 1       | 1.73028         | 8d      |
|                      | O19     | 0.20424 | -0.01749 | 0.61817  | 1       | 1.73028         | 8d      |
|                      | O20     | 0.19680 | 0.85901  | 0.59980  | 1       | 1.73028         | 8d      |
| O21                  | 1.00655 | 0.05534 | 0.77681  | 1        | 1.73028 | 8d              |         |
| O22                  | 1.00098 | 0.85193 | 0.75080  | 1        | 1.73028 | 8d              |         |
| O23                  | 0.42186 | 0.75000 | 0.63774  | 1        | 1.73028 | 4c              |         |
| O24                  | 0.18365 | 0.75000 | 0.61364  | 1        | 1.73028 | 4c              |         |
| O25                  | 0.29574 | 0.75000 | 0.07985  | 1        | 1.73028 | 4c              |         |
| O26                  | 0.09478 | 0.75000 | 0.10587  | 1        | 1.73028 | 4c              |         |
| Si1                  | 0.42149 | 0.05327 | 0.66977  | 1        | 0.86514 | 8d              |         |
| Si2                  | 0.31209 | 0.03267 | 0.83037  | 1        | 0.86514 | 8d              |         |
| Si3                  | 0.27907 | 0.06183 | 0.03274  | 1        | 0.86514 | 8d              |         |
| Si4                  | 0.11874 | 0.05807 | 0.03030  | 1        | 0.86514 | 8d              |         |
| Si5                  | 0.07391 | 0.02963 | 0.82086  | 1        | 0.86514 | 8d              |         |
| Si6                  | 0.19348 | 0.06171 | 0.66472  | 1.3346*  | 0.86514 | 8d              |         |
| Si7                  | 0.43022 | 0.82861 | 0.68293  | 1        | 0.86514 | 8d              |         |
| Si8                  | 0.31121 | 0.86714 | 0.82330  | 1        | 0.86514 | 8d              |         |
| Si9                  | 0.27795 | 0.82692 | 0.03767  | 1        | 0.86514 | 8d              |         |
| Si10                 | 0.11834 | 0.81607 | 0.03232  | 1        | 0.86514 | 8d              |         |
| Si11                 | 0.07271 | 0.86383 | 0.81411  | 1        | 0.86514 | 8d              |         |
| Si12                 | 0.18731 | 0.82692 | 0.67519  | 1        | 0.86514 | 8d              |         |
| Water1               | O1      | 0.35314 | 0.23586  | -0.12051 | 0.3406  | 8               | 8d      |
| Water2               | O2      | 0.48732 | 0.49544  | 0.06707  | 0.4175  | 8               | 8d      |
| Water3               | O3      | 0.61909 | 0.30742  | 0.56819  | 0.5779  | 8               | 8d      |
| Water4               | O4      | 0.51675 | 0.28235  | 0.90390  | 0.6172  | 8               | 8d      |

**Table S20.** Atomic parameters of Cu/B-Z derived from synchrotron PXRD.

| Species              | Atom    | x       | y        | z        | SOF     | B <sub>eq</sub> | Wyckoff |
|----------------------|---------|---------|----------|----------|---------|-----------------|---------|
| Zeolite<br>framework | O1      | 0.37439 | 0.06183  | 0.75485  | 1       | 1.73028         | 8d      |
|                      | O2      | 0.30843 | 0.06014  | 0.92019  | 1       | 1.73028         | 8d      |
|                      | O3      | 0.19967 | 0.06045  | 0.03227  | 1       | 1.73028         | 8d      |
|                      | O4      | 0.09096 | 0.06092  | 0.91501  | 1       | 1.73028         | 8d      |
|                      | O5      | 0.11881 | 0.05304  | 0.72666  | 1       | 1.73028         | 8d      |
|                      | O6      | 0.24172 | 0.04834  | 0.73954  | 1       | 1.73028         | 8d      |
|                      | O7      | 0.37975 | 0.84450  | 0.76134  | 1       | 1.73028         | 8d      |
|                      | O8      | 0.31314 | 0.84467  | 0.91851  | 1       | 1.73028         | 8d      |
|                      | O9      | 0.19003 | 0.84636  | 0.02615  | 1       | 1.73028         | 8d      |
|                      | O10     | 0.09219 | 0.83758  | 0.93354  | 1       | 1.73028         | 8d      |
|                      | O11     | 0.11418 | 0.84383  | 0.73161  | 1       | 1.73028         | 8d      |
|                      | O12     | 0.24904 | 0.85774  | 0.77817  | 1       | 1.73028         | 8d      |
|                      | O13     | 0.31183 | 0.96003  | 0.81917  | 1       | 1.73028         | 8d      |
|                      | O14     | 0.07785 | 0.94729  | 0.82187  | 1       | 1.73028         | 8d      |
|                      | O15     | 0.42134 | 0.12905  | 0.61701  | 1       | 1.73028         | 8d      |
|                      | O16     | 0.40273 | 0.99599  | 0.57894  | 1       | 1.73028         | 8d      |
|                      | O17     | 0.40140 | 0.87114  | 0.57054  | 1       | 1.73028         | 8d      |
|                      | O18     | 0.19283 | 0.12880  | 0.61905  | 1       | 1.73028         | 8d      |
|                      | O19     | 0.19170 | -0.00143 | 0.59485  | 1       | 1.73028         | 8d      |
|                      | O20     | 0.19928 | 0.86818  | 0.57730  | 1       | 1.73028         | 8d      |
| O21                  | 0.99872 | 0.04775 | 0.79441  | 1        | 1.73028 | 8d              |         |
| O22                  | 0.99952 | 0.84781 | 0.78421  | 1        | 1.73028 | 8d              |         |
| O23                  | 0.42804 | 0.75000 | 0.65033  | 1        | 1.73028 | 4c              |         |
| O24                  | 0.19182 | 0.75000 | 0.64219  | 1        | 1.73028 | 4c              |         |
| O25                  | 0.28222 | 0.75000 | 0.07094  | 1        | 1.73028 | 4c              |         |
| O26                  | 0.09929 | 0.75000 | 0.08109  | 1        | 1.73028 | 4c              |         |
| Si1                  | 0.42599 | 0.05721 | 0.66306  | 1        | 0.86514 | 8d              |         |
| Si2                  | 0.30768 | 0.02957 | 0.81107  | 1        | 0.86514 | 8d              |         |
| Si3                  | 0.27727 | 0.06332 | 0.02911  | 1        | 0.86514 | 8d              |         |
| Si4                  | 0.12257 | 0.06249 | 0.02250  | 1        | 0.86514 | 8d              |         |
| Si5                  | 0.06984 | 0.03118 | 0.81126  | 1        | 0.86514 | 8d              |         |
| Si6                  | 0.18793 | 0.06159 | 0.67112  | 1        | 0.86514 | 8d              |         |
| Si7                  | 0.42398 | 0.82858 | 0.67892  | 1        | 0.86514 | 8d              |         |
| Si8                  | 0.31146 | 0.86726 | 0.81668  | 1        | 0.86514 | 8d              |         |
| Si9                  | 0.27839 | 0.82553 | 0.03141  | 1        | 0.86514 | 8d              |         |
| Si10                 | 0.12425 | 0.82453 | 0.03381  | 1        | 0.86514 | 8d              |         |
| Si11                 | 0.07494 | 0.86972 | 0.81423  | 1        | 0.86514 | 8d              |         |
| Si12                 | 0.18733 | 0.82701 | 0.68146  | 1.0842*  | 0.86514 | 8d              |         |
| Water1               | O1      | 0.49092 | 0.30494  | -0.07982 | 0.4289  | 8               | 8d      |

**Table S21.** Catalytic performance of 4-chlorostyrene of the zeolite sample labelled.

| Catalyst   | Reaction temp. (°C) | Conv. <sub>(4Cl-styrene)</sub> (%) | Sel. <sub>(4Cl-benzaldehyde)</sub> (%) | Activation energy (kJ) |
|------------|---------------------|------------------------------------|----------------------------------------|------------------------|
| Fe/Al-Z    | 50                  | 7.2                                | 54.1                                   | 87.685                 |
|            | 70                  | 35.0                               | 74.7                                   |                        |
|            | 90                  | 24.1                               | 74.0                                   |                        |
| Fe/Ga-Z    | 50                  | 6.9                                | 67.5                                   | 51.578                 |
|            | 70                  | 33.6                               | 71.5                                   |                        |
|            | 90                  | 51.6                               | 73.4                                   |                        |
| Fe/B-Z     | 50                  | 9.3                                | 74.5                                   | 49.533                 |
|            | 70                  | 57.4                               | 75.4                                   |                        |
|            | 90                  | 65.3                               | 78.6                                   |                        |
| Cu/Al-Z    | 50                  | No reaction                        | -                                      | 50.060                 |
|            | 70                  | 36.9                               | 57.8                                   |                        |
|            | 90                  | 30.3                               | 76.6                                   |                        |
|            | 110                 | 73.0                               | 75.6                                   |                        |
| Cu/Ga-Z    | 50                  | No reaction                        | -                                      | 70.744                 |
|            | 70                  | 10.6                               | 37.0                                   |                        |
|            | 90                  | 23.6                               | 85.5                                   |                        |
|            | 110                 | 78.6                               | 65.9                                   |                        |
| Cu/B-Z     | 50                  | No reaction                        | -                                      | 84.369                 |
|            | 70                  | 9.6                                | 67.3                                   |                        |
|            | 90                  | 13.3                               | 78.3                                   |                        |
|            | 110                 | 61.5                               | 72.9                                   |                        |
| Na-Fe/Al-Z | 70                  | 16.3                               | 76.0                                   | -                      |
| Na-Fe/Ga-Z | 70                  | 12.7                               | 62.0                                   | -                      |
| Na-Fe/B-Z  | 70                  | 15.2                               | 71.5                                   | -                      |
| H-ZSM-5    | 70                  | 14.7                               | 55.1                                   | -                      |
| Na-ZSM-5   | 70                  | No reaction                        | -                                      | -                      |

**Table S22.** Crystallographic data of the synchrotron PXRD measurement of the 4-chlorostyrene (4Cl-sty) and GVL pre-adsorbed zeolite sample labelled.

|                                      | 4Cl-sty-Fe/Al-Z    | 4Cl-sty-Fe/B-Z     | GVL-Fe/Al-Z        | GVL-Fe/B-Z         |
|--------------------------------------|--------------------|--------------------|--------------------|--------------------|
| Diffractometer                       | Rigaku SmartLab    | Rigaku SmartLab    | Rigaku SmartLab    | Rigaku SmartLab    |
| Wavelength<br>h (Å)                  | 0.7093             | 0.7093             | 0.7093             | 0.7093             |
| 2θ – zero<br>point (°)               | -0.00557(17)       | -0.00817(16)       | -0.00154(28)       | -0.00335           |
| Space<br>group                       | <i>Pnma</i>        | <i>Pnma</i>        | <i>Pnma</i>        | <i>Pnma</i>        |
| Crystal<br>system                    | Orthorhombic       | Orthorhombic       | Orthorhombic       | Orthorhombic       |
| <i>a</i> (Å)                         | 20.11775(58)       | 20.01241(48)       | 20.12910(72)       | 20.04154(30)       |
| <i>b</i> (Å)                         | 19.92743(53)       | 19.88942(54)       | 19.95968(86)       | 19.86729(33)       |
| <i>c</i> (Å)                         | 13.40824(40)       | 13.36641(37)       | 13.44821(56)       | 13.37965(25)       |
| <i>V</i> (Å <sup>3</sup> )           | 5375.30(27)        | 5320.29(24)        | 5403.09(38)        | 5327.39(15)        |
| 2θ range<br>for<br>refinement<br>(°) | 3-50               | 3-50               | 3-50               | 3-50               |
| Detector                             | D/tex Ultra 250-HE | D/tex Ultra 250-HE | D/tex Ultra 250-HE | D/tex Ultra 250-HE |
| Number of<br>parameters              | 24                 | 24                 | 24                 | 24                 |
| Number of<br><i>hkl</i> s            | 5036               | 8187               | 5073               | 4986               |
| Refinement<br>methods                | LeBail             | LeBail             | LeBail             | LeBail             |
| $R_{wp}/R_{exp}/R_p$<br>(%)          | 2.329/2.828/1.791  | 4.467/3.051/3.239  | 4.073/6.008/3.012  | 4.253/6.069/3.290  |
| <i>Gof</i>                           | 0.824              | 1.464              | 0.678              | 0.701              |

$R_{wp}$ : weighted profile;  $R_{exp}$ : expected;  $R_p$ : profile; *gof*: goodness-of-fit.

**Table S23.** Atomic parameters of 4Cl-sty-Fe/Al-Z derived from PXRD.

| Species              | Atom | x        | y        | z        | SOF    | B <sub>eq</sub> | Wyckoff |
|----------------------|------|----------|----------|----------|--------|-----------------|---------|
| Zeolite<br>framework | O1   | 0.38399  | 0.05878  | 0.76741  | 1      | 0.1941          | 8d      |
|                      | O2   | 0.28158  | 0.05573  | 0.93411  | 1      | 0.1941          | 8d      |
|                      | O3   | 0.18726  | 0.04622  | 0.02763  | 1      | 0.1941          | 8d      |
|                      | O4   | 0.0833   | 0.0704   | 0.9258   | 1      | 0.1941          | 8d      |
|                      | O5   | 0.11522  | 0.04014  | 0.71712  | 1      | 0.1941          | 8d      |
|                      | O6   | 0.25712  | 0.03818  | 0.74286  | 1      | 0.1941          | 8d      |
|                      | O7   | 0.37293  | 0.84347  | 0.76652  | 1      | 0.1941          | 8d      |
|                      | O8   | 0.31422  | 0.83556  | 0.93155  | 1      | 0.1941          | 8d      |
|                      | O9   | 0.20253  | 0.84841  | -0.01042 | 1      | 0.1941          | 8d      |
|                      | O10  | 0.08887  | 0.83149  | 0.91674  | 1      | 0.1941          | 8d      |
|                      | O11  | 0.12424  | 0.844    | 0.73922  | 1      | 0.1941          | 8d      |
|                      | O12  | 0.22386  | 0.84756  | 0.77626  | 1      | 0.1941          | 8d      |
|                      | O13  | 0.3093   | 0.94395  | 0.8213   | 1      | 0.1941          | 8d      |
|                      | O14  | 0.0881   | 0.95694  | 0.80367  | 1      | 0.1941          | 8d      |
|                      | O15  | 0.4167   | 0.13068  | 0.60315  | 1      | 0.1941          | 8d      |
|                      | O16  | 0.41828  | 0.99026  | 0.59621  | 1      | 0.1941          | 8d      |
|                      | O17  | 0.40663  | 0.87397  | 0.59093  | 1      | 0.1941          | 8d      |
|                      | O18  | 0.1878   | 0.11457  | 0.61751  | 1      | 0.1941          | 8d      |
|                      | O19  | 0.23153  | 0.0079   | 0.61313  | 1      | 0.1941          | 8d      |
|                      | O20  | 0.19795  | 0.84274  | 0.58141  | 1      | 0.1941          | 8d      |
|                      | O21  | 0.9988   | 0.05178  | 0.78692  | 1      | 0.1941          | 8d      |
|                      | O22  | 0.99935  | 0.83687  | 0.77263  | 1      | 0.1941          | 8d      |
|                      | O23  | 0.43513  | 0.75     | 0.62121  | 1      | 0.1941          | 4c      |
|                      | O24  | 0.20272  | 0.75     | 0.62301  | 1      | 0.1941          | 4c      |
|                      | O25  | 0.313    | 0.75     | 0.04502  | 1      | 0.1941          | 4c      |
|                      | O26  | 0.09524  | 0.75     | 0.0782   | 1      | 0.1941          | 4c      |
| 4-Cl-sty             | Si1  | 0.42606  | 0.06764  | 0.66273  | 1      | 0.097           | 8d      |
|                      | Si2  | 0.32293  | 0.03747  | 0.83325  | 1      | 0.097           | 8d      |
|                      | Si3  | 0.26831  | 0.0716   | 0.03174  | 1      | 0.097           | 8d      |
|                      | Si4  | 0.12128  | 0.07527  | 0.02309  | 1      | 0.097           | 8d      |
|                      | Si5  | 0.07129  | 0.02925  | 0.81017  | 1      | 0.097           | 8d      |
|                      | Si6  | 0.18292  | 0.05472  | 0.68203  | 1.4655 | 0.097           | 8d      |
|                      | Si7  | 0.433    | 0.82948  | 0.6832   | 1      | 0.097           | 8d      |
|                      | Si8  | 0.31414  | 0.86191  | 0.82342  | 1      | 0.097           | 8d      |
|                      | Si9  | 0.27583  | 0.84036  | 0.04001  | 1      | 0.097           | 8d      |
|                      | Si10 | 0.11537  | 0.82756  | 0.04262  | 1      | 0.097           | 8d      |
|                      | Si11 | 0.07958  | 0.86622  | 0.81762  | 1      | 0.097           | 8d      |
|                      | Si12 | 0.1933   | 0.83018  | 0.67705  | 1      | 0.097           | 8d      |
| 4-Cl-sty             | C11  | 0.42768  | -0.02431 | -0.04426 | 0.8511 | 8               | 8d      |
|                      | C2   | 0.44962  | 0.068549 | -0.02199 | 0.8511 | 8               | 8d      |
|                      | C3   | 0.498821 | 0.086401 | 0.04602  | 0.8511 | 8               | 8d      |
|                      | C4   | 0.514738 | 0.152872 | 0.062259 | 0.8511 | 8               | 8d      |
|                      | C5   | 0.481573 | 0.20371  | 0.010441 | 0.8511 | 8               | 8d      |
|                      | C6   | 0.432138 | 0.185687 | -0.05789 | 0.8511 | 8               | 8d      |
|                      | C7   | 0.416608 | 0.119063 | -0.07356 | 0.8511 | 8               | 8d      |
|                      | C8   | 0.496921 | 0.268667 | 0.026017 | 0.8511 | 8               | 8d      |
|                      | C9   | 0.544947 | 0.295024 | -0.03224 | 0.8511 | 8               | 8d      |

**Table S24.** Atomic parameters of 4Cl-sty-Fe/B-Z derived from PXRD.

| Species              | Atom | x        | y        | z        | SOF    | B <sub>eq</sub> | Wyckoff |
|----------------------|------|----------|----------|----------|--------|-----------------|---------|
| Zeolite<br>framework | O1   | 0.37846  | 0.04456  | 0.7543   | 1      | 0.6848          | 8d      |
|                      | O2   | 0.30255  | 0.05825  | 0.92132  | 1      | 0.6848          | 8d      |
|                      | O3   | 0.19771  | 0.06239  | 0.03627  | 1      | 0.6848          | 8d      |
|                      | O4   | 0.09774  | 0.06008  | 0.90918  | 1      | 0.6848          | 8d      |
|                      | O5   | 0.11632  | 0.0525   | 0.73301  | 1      | 0.6848          | 8d      |
|                      | O6   | 0.25356  | 0.04071  | 0.73525  | 1      | 0.6848          | 8d      |
|                      | O7   | 0.37667  | 0.8333   | 0.76649  | 1      | 0.6848          | 8d      |
|                      | O8   | 0.31233  | 0.84136  | 0.91544  | 1      | 0.6848          | 8d      |
|                      | O9   | 0.19782  | 0.84948  | 0.03346  | 1      | 0.6848          | 8d      |
|                      | O10  | 0.09304  | 0.83247  | 0.91558  | 1      | 0.6848          | 8d      |
|                      | O11  | 0.11448  | 0.84535  | 0.74292  | 1      | 0.6848          | 8d      |
|                      | O12  | 0.2269   | 0.84348  | 0.74855  | 1      | 0.6848          | 8d      |
|                      | O13  | 0.31314  | 0.94349  | 0.81784  | 1      | 0.6848          | 8d      |
|                      | O14  | 0.083    | 0.94816  | 0.81488  | 1      | 0.6848          | 8d      |
|                      | O15  | 0.42729  | 0.12889  | 0.59605  | 1      | 0.6848          | 8d      |
|                      | O16  | 0.41533  | 0.9871   | 0.58405  | 1      | 0.6848          | 8d      |
|                      | O17  | 0.39958  | 0.86522  | 0.56047  | 1      | 0.6848          | 8d      |
|                      | O18  | 0.18625  | 0.12612  | 0.60881  | 1      | 0.6848          | 8d      |
|                      | O19  | 0.19668  | 0.008    | 0.5778   | 1      | 0.6848          | 8d      |
|                      | O20  | 0.19989  | 0.87331  | 0.57849  | 1      | 0.6848          | 8d      |
|                      | O21  | 0.99577  | 0.04711  | 0.79585  | 1      | 0.6848          | 8d      |
|                      | O22  | 0.99936  | 0.85809  | 0.79922  | 1      | 0.6848          | 8d      |
|                      | O23  | 0.42216  | 0.75     | 0.6502   | 1      | 0.6848          | 4c      |
|                      | O24  | 0.18939  | 0.75     | 0.65863  | 1      | 0.6848          | 4c      |
|                      | O25  | 0.28173  | 0.75     | 0.04457  | 1      | 0.6848          | 4c      |
|                      | O26  | 0.09582  | 0.75     | 0.05746  | 1      | 0.6848          | 4c      |
| 4-Cl-sty             | Si1  | 0.42525  | 0.05682  | 0.6514   | 1      | 0.3424          | 8d      |
|                      | Si2  | 0.31554  | 0.0252   | 0.82444  | 1.2786 | 0.3424          | 8d      |
|                      | Si3  | 0.27542  | 0.06648  | 0.02767  | 1      | 0.3424          | 8d      |
|                      | Si4  | 0.123    | 0.06121  | 0.01425  | 1      | 0.3424          | 8d      |
|                      | Si5  | 0.0693   | 0.02965  | 0.79928  | 1      | 0.3424          | 8d      |
|                      | Si6  | 0.18213  | 0.06262  | 0.66263  | 1      | 0.3424          | 8d      |
|                      | Si7  | 0.42143  | 0.82977  | 0.67589  | 1      | 0.3424          | 8d      |
|                      | Si8  | 0.30501  | 0.87318  | 0.8045   | 1      | 0.3424          | 8d      |
|                      | Si9  | 0.27615  | 0.82871  | 0.02818  | 1      | 0.3424          | 8d      |
|                      | Si10 | 0.12053  | 0.8229   | 0.03505  | 1      | 0.3424          | 8d      |
|                      | Si11 | 0.06846  | 0.86274  | 0.81932  | 1      | 0.3424          | 8d      |
|                      | Si12 | 0.18557  | 0.82948  | 0.66918  | 1      | 0.3424          | 8d      |
| 4-Cl-sty             | C11  | -0.06098 | 0.5132   | 0.45773  | 0.4062 | 8               | 8d      |
|                      | C2   | -0.07135 | 0.424641 | 0.513972 | 0.4062 | 8               | 8d      |
|                      | C3   | -0.04573 | 0.368587 | 0.465033 | 0.4062 | 8               | 8d      |
|                      | C4   | -0.05303 | 0.305011 | 0.505011 | 0.4062 | 8               | 8d      |
|                      | C5   | -0.08644 | 0.295725 | 0.595812 | 0.4062 | 8               | 8d      |
|                      | C6   | -0.11217 | 0.35211  | 0.644907 | 0.4062 | 8               | 8d      |
|                      | C7   | -0.10459 | 0.415465 | 0.604272 | 0.4062 | 8               | 8d      |
|                      | C8   | -0.0937  | 0.233775 | 0.635156 | 0.4062 | 8               | 8d      |
|                      | C9   | -0.04498 | 0.212526 | 0.697187 | 0.4062 | 8               | 8d      |

**Table S25.** Atomic parameters of GVL-Fe/Al-Z derived from PXRD.

| Species              | Atom | x        | y        | z        | SOF    | B <sub>eq</sub> | Wyckoff |
|----------------------|------|----------|----------|----------|--------|-----------------|---------|
| Zeolite<br>framework | O1   | 0.39307  | 0.05508  | 0.75835  | 1      | 0.0783          | 8d      |
|                      | O2   | 0.30006  | 0.05278  | 0.9248   | 1      | 0.0783          | 8d      |
|                      | O3   | 0.19555  | 0.06785  | 0.03664  | 1      | 0.0783          | 8d      |
|                      | O4   | 0.09335  | 0.06499  | 0.92963  | 1      | 0.0783          | 8d      |
|                      | O5   | 0.1077   | 0.05233  | 0.73747  | 1      | 0.0783          | 8d      |
|                      | O6   | 0.25159  | 0.03222  | 0.75088  | 1      | 0.0783          | 8d      |
|                      | O7   | 0.37149  | 0.8291   | 0.75601  | 1      | 0.0783          | 8d      |
|                      | O8   | 0.31226  | 0.83354  | 0.93241  | 1      | 0.0783          | 8d      |
|                      | O9   | 0.18104  | 0.84347  | 0.02251  | 1      | 0.0783          | 8d      |
|                      | O10  | 0.09732  | 0.84165  | 0.92837  | 1      | 0.0783          | 8d      |
|                      | O11  | 0.11863  | 0.84584  | 0.74045  | 1      | 0.0783          | 8d      |
|                      | O12  | 0.22675  | 0.83588  | 0.74783  | 1      | 0.0783          | 8d      |
|                      | O13  | 0.31746  | 0.94589  | 0.81134  | 1      | 0.0783          | 8d      |
|                      | O14  | 0.07893  | 0.96925  | 0.8524   | 1      | 0.0783          | 8d      |
|                      | O15  | 0.41833  | 0.13184  | 0.60776  | 1      | 0.0783          | 8d      |
|                      | O16  | 0.40526  | 0.9989   | 0.5674   | 1      | 0.0783          | 8d      |
|                      | O17  | 0.39508  | 0.85595  | 0.55118  | 1      | 0.0783          | 8d      |
|                      | O18  | 0.19649  | 0.12847  | 0.59526  | 1      | 0.0783          | 8d      |
|                      | O19  | 0.20624  | -0.00915 | 0.57762  | 1      | 0.0783          | 8d      |
|                      | O20  | 0.1995   | 0.86953  | 0.58716  | 1      | 0.0783          | 8d      |
|                      | O21  | 0.99816  | 0.06328  | 0.79917  | 1      | 0.0783          | 8d      |
|                      | O22  | 1.00053  | 0.84426  | 0.76162  | 1      | 0.0783          | 8d      |
|                      | O23  | 0.43516  | 0.75     | 0.66466  | 1      | 0.0783          | 4c      |
|                      | O24  | 0.19814  | 0.75     | 0.6766   | 1      | 0.0783          | 4c      |
|                      | O25  | 0.29264  | 0.75     | 0.06819  | 1      | 0.0783          | 4c      |
|                      | O26  | 0.10279  | 0.75     | 0.07787  | 1      | 0.0783          | 4c      |
| GVL1                 | Si1  | 0.42263  | 0.06215  | 0.65924  | 1      | 0.0391          | 8d      |
|                      | Si2  | 0.31424  | 0.02616  | 0.81001  | 1      | 0.0391          | 8d      |
|                      | Si3  | 0.27196  | 0.06216  | 0.03914  | 1      | 0.0391          | 8d      |
|                      | Si4  | 0.11708  | 0.07182  | 0.02464  | 1      | 0.0391          | 8d      |
|                      | Si5  | 0.07281  | 0.03726  | 0.82548  | 1      | 0.0391          | 8d      |
|                      | Si6  | 0.18078  | 0.05318  | 0.68277  | 1.4655 | 0.0391          | 8d      |
|                      | Si7  | 0.42254  | 0.83121  | 0.66751  | 1      | 0.0391          | 8d      |
|                      | Si8  | 0.31033  | 0.85628  | 0.80372  | 1      | 0.0391          | 8d      |
|                      | Si9  | 0.27183  | 0.8257   | 0.02391  | 1      | 0.0391          | 8d      |
|                      | Si10 | 0.12367  | 0.83036  | 0.02057  | 1      | 0.0391          | 8d      |
|                      | Si11 | 0.06119  | 0.87702  | 0.81605  | 1      | 0.0391          | 8d      |
|                      | Si12 | 0.18274  | 0.82418  | 0.65791  | 1      | 0.0391          | 8d      |
| GVL1                 | O1   | -0.23101 | -0.25501 | 0.20205  | 0.4062 | 8               | 8d      |
|                      | C2   | -0.28835 | -0.25249 | 0.169251 | 0.4062 | 8               | 8d      |
|                      | C3   | -0.30461 | -0.26493 | 0.062113 | 0.4062 | 8               | 8d      |
|                      | C4   | -0.37816 | -0.28321 | 0.075302 | 0.4062 | 8               | 8d      |
|                      | C5   | -0.39424 | -0.23823 | 0.163103 | 0.4062 | 8               | 8d      |
|                      | C6   | -0.45596 | -0.26036 | 0.222006 | 0.4062 | 8               | 8d      |
|                      | O7   | -0.33719 | -0.22493 | 0.225266 | 0.4062 | 8               | 8d      |



**Table S26.** Atomic parameters of GVL-Fe/B-Z derived from PXRD.

| Species              | Atom | x        | y        | z        | SOF    | Beq    | Wyckoff |
|----------------------|------|----------|----------|----------|--------|--------|---------|
| Zeolite<br>framework | O1   | 0.3767   | 0.05686  | 0.75479  | 1      | 0.887  | 8d      |
|                      | O2   | 0.30619  | 0.05106  | 0.93662  | 1      | 0.887  | 8d      |
|                      | O3   | 0.20404  | 0.0635   | 0.03351  | 1      | 0.887  | 8d      |
|                      | O4   | 0.09899  | 0.05903  | 0.90753  | 1      | 0.887  | 8d      |
|                      | O5   | 0.11556  | 0.04714  | 0.72618  | 1      | 0.887  | 8d      |
|                      | O6   | 0.24291  | 0.0406   | 0.74579  | 1      | 0.887  | 8d      |
|                      | O7   | 0.37887  | 0.83434  | 0.76967  | 1      | 0.887  | 8d      |
|                      | O8   | 0.30478  | 0.83507  | 0.91662  | 1      | 0.887  | 8d      |
|                      | O9   | 0.20903  | 0.84221  | 0.02826  | 1      | 0.887  | 8d      |
|                      | O10  | 0.08594  | 0.83661  | 0.91963  | 1      | 0.887  | 8d      |
|                      | O11  | 0.12537  | 0.83796  | 0.73282  | 1      | 0.887  | 8d      |
|                      | O12  | 0.23988  | 0.84741  | 0.77008  | 1      | 0.887  | 8d      |
|                      | O13  | 0.31517  | 0.93993  | 0.81996  | 1      | 0.887  | 8d      |
|                      | O14  | 0.0811   | 0.94061  | 0.82238  | 1      | 0.887  | 8d      |
|                      | O15  | 0.41755  | 0.13087  | 0.60403  | 1      | 0.887  | 8d      |
|                      | O16  | 0.40589  | 0.9998   | 0.57135  | 1      | 0.887  | 8d      |
|                      | O17  | 0.38962  | 0.85873  | 0.57453  | 1      | 0.887  | 8d      |
|                      | O18  | 0.20098  | 0.11991  | 0.63244  | 1      | 0.887  | 8d      |
|                      | O19  | 0.19218  | 0.00993  | 0.60727  | 1      | 0.887  | 8d      |
|                      | O20  | 0.20698  | 0.8583   | 0.60123  | 1      | 0.887  | 8d      |
|                      | O21  | 0.9902   | 0.04613  | 0.79892  | 1      | 0.887  | 8d      |
|                      | O22  | 0.98764  | 0.8525   | 0.78882  | 1      | 0.887  | 8d      |
|                      | O23  | 0.43218  | 0.75     | 0.64883  | 1      | 0.887  | 4c      |
|                      | O24  | 0.18441  | 0.75     | 0.65766  | 1      | 0.887  | 4c      |
|                      | O25  | 0.28109  | 0.75     | 0.05715  | 1      | 0.887  | 4c      |
|                      | O26  | 0.09823  | 0.75     | 0.06307  | 1      | 0.887  | 4c      |
| GVL1                 | Si1  | 0.42281  | 0.06252  | 0.66092  | 1      | 0.4435 | 8d      |
|                      | Si2  | 0.3094   | 0.02423  | 0.82168  | 1      | 0.4435 | 8d      |
|                      | Si3  | 0.27533  | 0.06012  | 0.03387  | 1      | 0.4435 | 8d      |
|                      | Si4  | 0.12119  | 0.06761  | 0.01499  | 1      | 0.4435 | 8d      |
|                      | Si5  | 0.06856  | 0.02724  | 0.80209  | 1      | 0.4435 | 8d      |
|                      | Si6  | 0.18494  | 0.05095  | 0.6706   | 1.2786 | 0.4435 | 8d      |
|                      | Si7  | 0.41951  | 0.82336  | 0.67547  | 1      | 0.4435 | 8d      |
|                      | Si8  | 0.30499  | 0.87383  | 0.80578  | 1      | 0.4435 | 8d      |
|                      | Si9  | 0.27572  | 0.82787  | 0.04124  | 1      | 0.4435 | 8d      |
|                      | Si10 | 0.12292  | 0.83469  | 0.04091  | 1      | 0.4435 | 8d      |
|                      | Si11 | 0.07247  | 0.87495  | 0.80975  | 1      | 0.4435 | 8d      |
|                      | Si12 | 0.19067  | 0.82734  | 0.67882  | 1      | 0.4435 | 8d      |
| GVL1                 | O1   | 0.08929  | -0.28655 | 0.36562  | 0.7346 | 8      | 8d      |
|                      | C2   | 0.051614 | -0.32146 | 0.417244 | 0.7346 | 8      | 8d      |
|                      | C3   | 0.041815 | -0.39536 | 0.399448 | 0.7346 | 8      | 8d      |
|                      | C4   | 0.016477 | -0.41427 | 0.503944 | 0.7346 | 8      | 8d      |
|                      | C5   | -0.02031 | -0.34952 | 0.529036 | 0.7346 | 8      | 8d      |
|                      | C6   | -0.03127 | -0.33879 | 0.641701 | 0.7346 | 8      | 8d      |
|                      | O7   | 0.007312 | -0.29126 | 0.4793   | 0.7346 | 8      | 8d      |

## Reference

- [1] S. Kawaguchi, M. Takemoto, K. Osaka, E. Nishibori, C. Moriyoshi, Y. Kubota, Y. Kuroiwa, K. Sugimoto, *Rev. Sci. Instrum.* **2017**, *88*, 85111.
- [2] N. H. Heo, C. W. Kim, H. J. Kwon, G. H. Kim, S. H. Kim, S. B. Hong, K. Seff, *J. Phys. Chem. C* **2009**, *113*, 19937–19956.
- [3] P. Thompson, D. E. Cox, J. B. Hastings, *J. Appl. Crystallogr.* **1987**, *20*, 79–83.
